# Supplementary material
Source: publisher site journal article supplement (https://www.dovepress.com/get_supplementary_file.php?f=458491.docx)
Supplement: Supplementary file 1 [file get_supplementary_file.php]

**Supplementary Materials**

**Supplementary Tables**

**Supplementary Table S1** **|** The sources for all statistical summary datasets used in this study.

**Supplementary Table S2 |** Characteristics of SNPs extracted from exposure (disorder of the sleep-wake schedule) GWAS statistical summary data.

**Supplementary Table S3 |** Details of phenotypes related to 11 instrumental variables found on the Phenoscanner websit.

**Supplementary Table S4 |** Sensitivity Analysis of Mendel Randomization Results.

**Supplementary Table S5 |** Comparison of basic information between individuals with and without Primary Liver Cancer (before and after PSM).

**Supplementary Table S6 |** Clinicopathological features of individuals with and without Primary Liver Cancer.

**Supplementary Table S7 |** Analysis of sleep status between individuals with and without Primary Liver Cancer.

**Supplementary Table S8 |** The mediation and moderation effects of various levels of gut microbiota on the relationship between self sleep quality assessment and Primary Liver Cancer.

**Supplementary Table S9 |** The mediation and moderation effects of various levels of gut microbiota on the relationship between time required to go to sleep at night and Primary Liver Cancer.

**Supplementary Table S10 |** The mediation and moderation effects of various levels of gut microbiota on the relationship between sleep time at night and Primary Liver Cancer.

**Supplementary Table S11 |** The mediation and moderation effects of various levels of gut microbiota on the relationship between nocturnal sleep disorder and Primary Liver Cancer.

**Supplementary Table S12 |** The mediation and moderation effects of various levels of gut microbiota on the relationship between daytime dysfunction and Primary Liver Cancer.

**Supplementary Figure Legends**

**Supplementary Figure S1 |** Flow chart of the Mendel Randomization Analysis of disorder of the sleep-wake schedule on Primary Liver Cancer.

**Supplementary Figure S2 |** Leave-one-out analysis result and Scatter plot of SNPs associated with disorder of the sleep-wake schedule on primary liver cancer. **A.** Leave-one-out analysis result of SNPs associated with disorder of the sleep-wake schedule on Primary Liver Cancer; **B.** Scatter plot of SNPs associated with disorder of the sleep-wake schedule on Primary Liver Cancer.

**Supplementary Figure S3 |** The Mendel Randomization Analysis of disorder of the sleep-wake schedule on Primary Liver Cancer. **Abbreviations:** MR-RAPS: MR robust adjusted profile score.

**Supplementary Figure S4 |** The distribution and differences description of PSQI score between individuals with and without Primary Liver Cancer. **A.** PSQI score distribution; **B.** Description of PSQI score difference between two groups; *: *P*< 0.05; **: *P*< 0.01; ***: *P*< 0.001. **Abbreviation:** PSQI Score: Pittsburgh Sleep Quality Index Score.

**Supplementary Figure S5 |** Dominant species at each level of gut microbiota between individuals with and without Primary Liver Cancer. **A.** Top 20 dominant flora at Phylum level; **B.** Top 20 dominant flora at Class level; **C.** Top 20 dominant flora at Order level; **D.** Top 20 dominant flora at Family level; **E.** Top 20 dominant flora at Genus level.

**Supplementary Figure S6 |** The moderation effect of gut microbiota on the relationship between sleep quality and Primary Liver Cancer by Johnson Neyman method. **A.** Test of the regulatory effect of *Actinobacteria*; **B.** Test of the regulatory effect of *Erysipelotrichales*; **C-D.** Test of the regulatory effect of *Roseburia*; **E.** Test of the regulatory effect of *Bifidobacterium*.

**Supplementary Figure Legends**

**
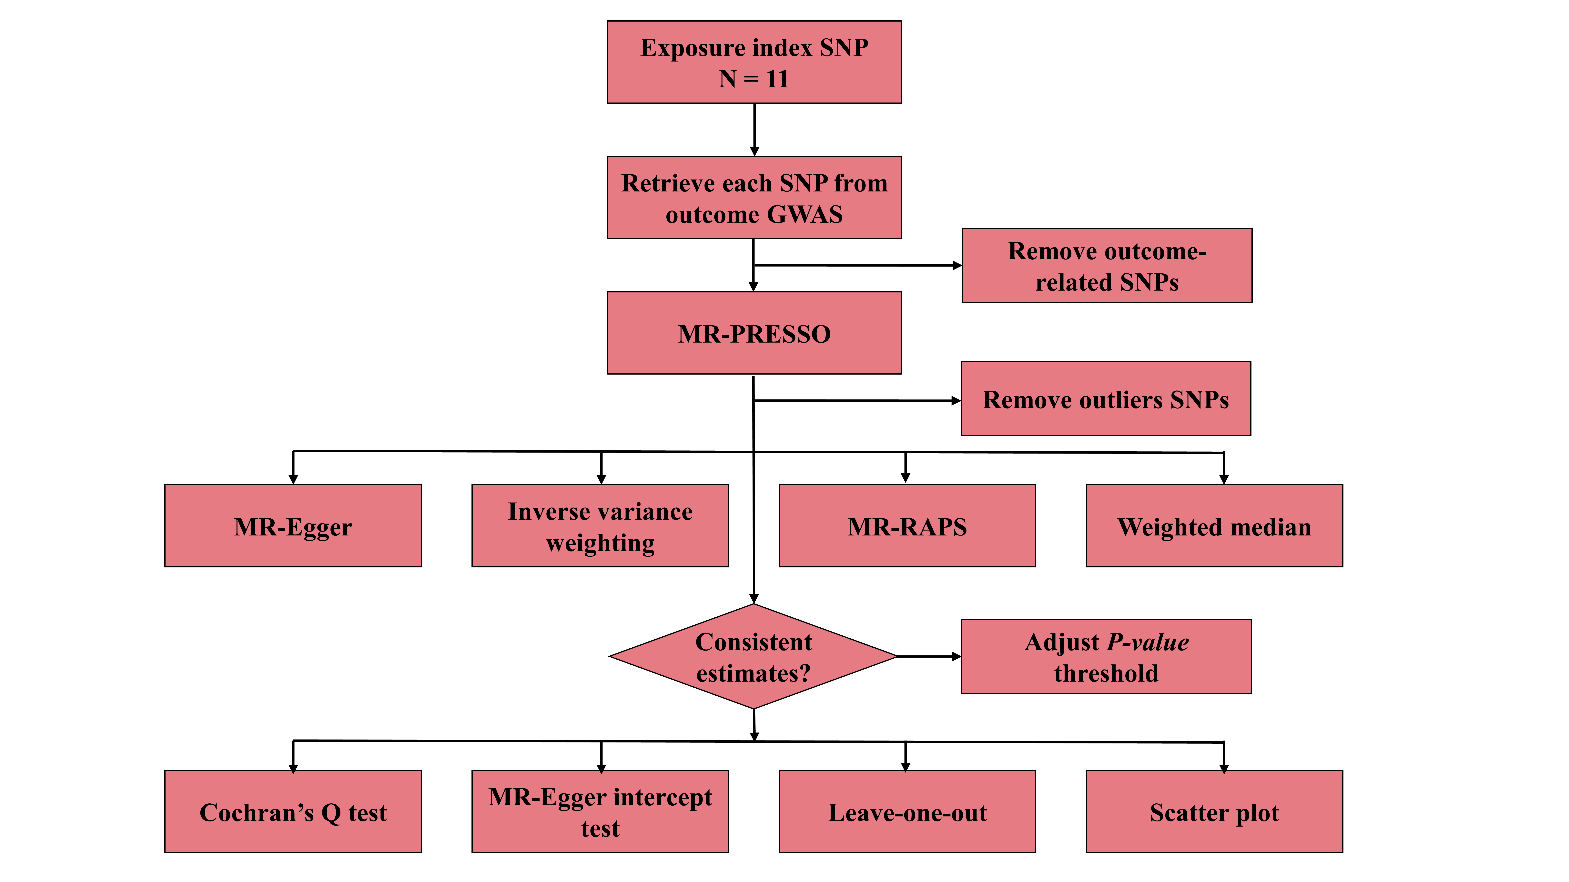
**

**Supplementary Figure S1 |** Flow chart of the Mendel Randomization Analysis of disorder of the sleep-wake schedule on Primary Liver Cancer.


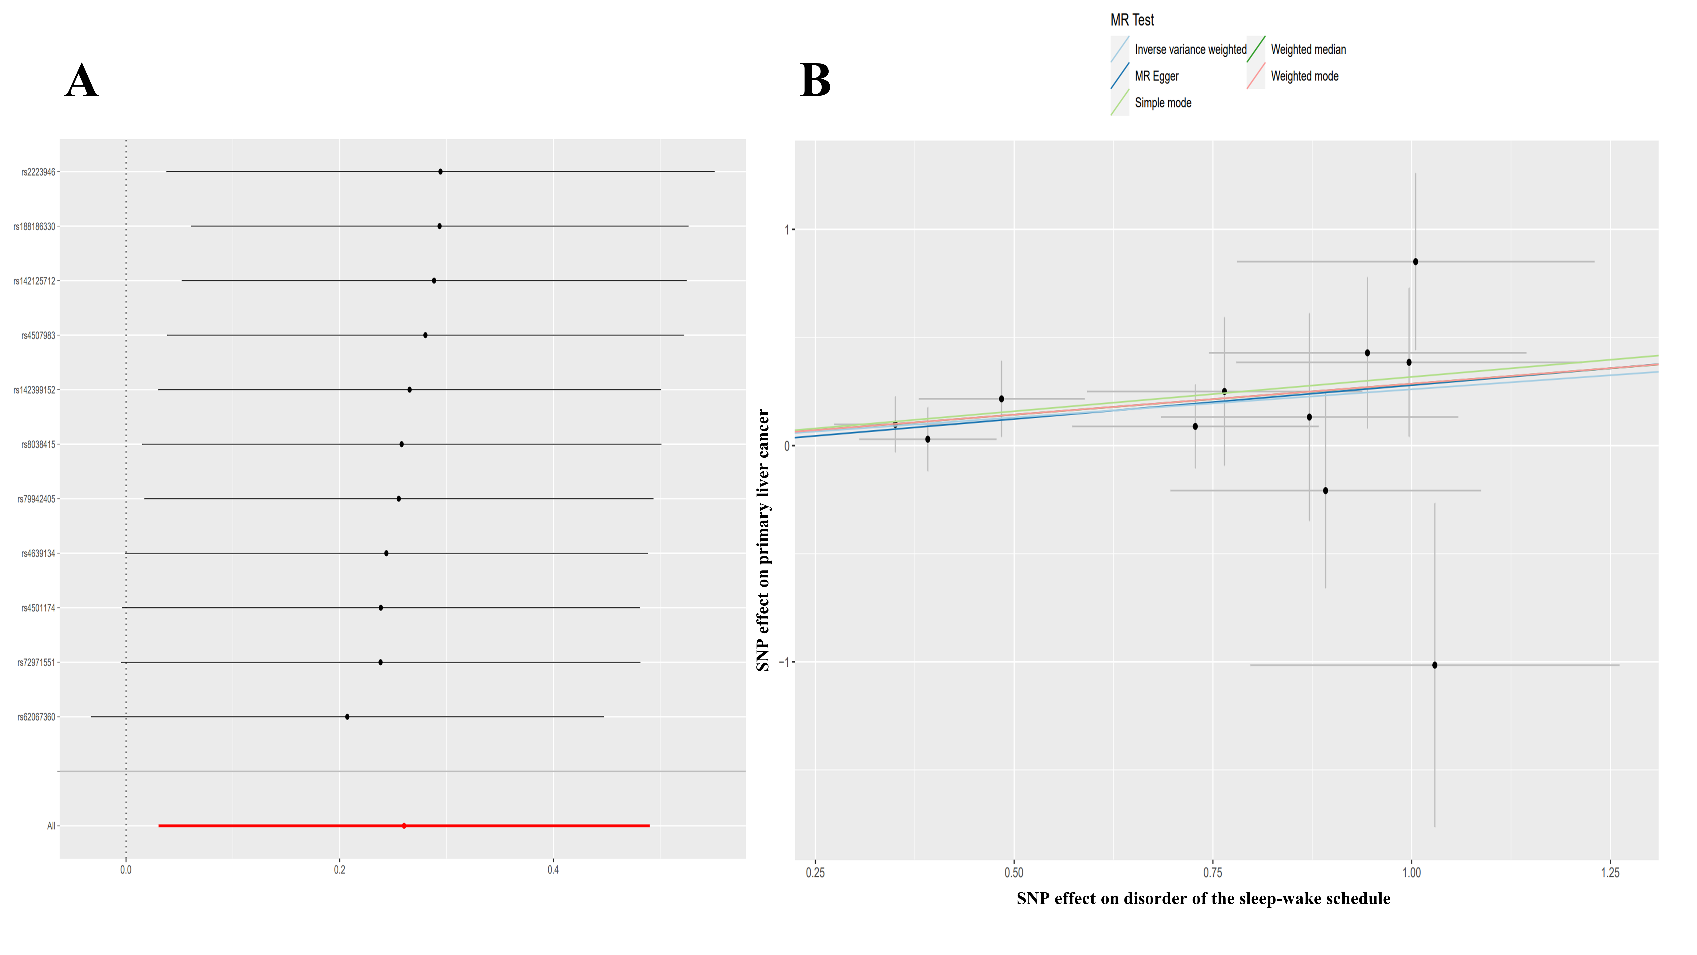


**Supplementary Figure S2 |** Leave-one-out analysis result and Scatter plot of SNPs associated with disorder of the sleep-wake schedule on primary liver cancer. **A.** Leave-one-out analysis result of SNPs associated with disorder of the sleep-wake schedule on Primary Liver Cancer; **B.** Scatter plot of SNPs associated with disorder of the sleep-wake schedule on Primary Liver Cancer.


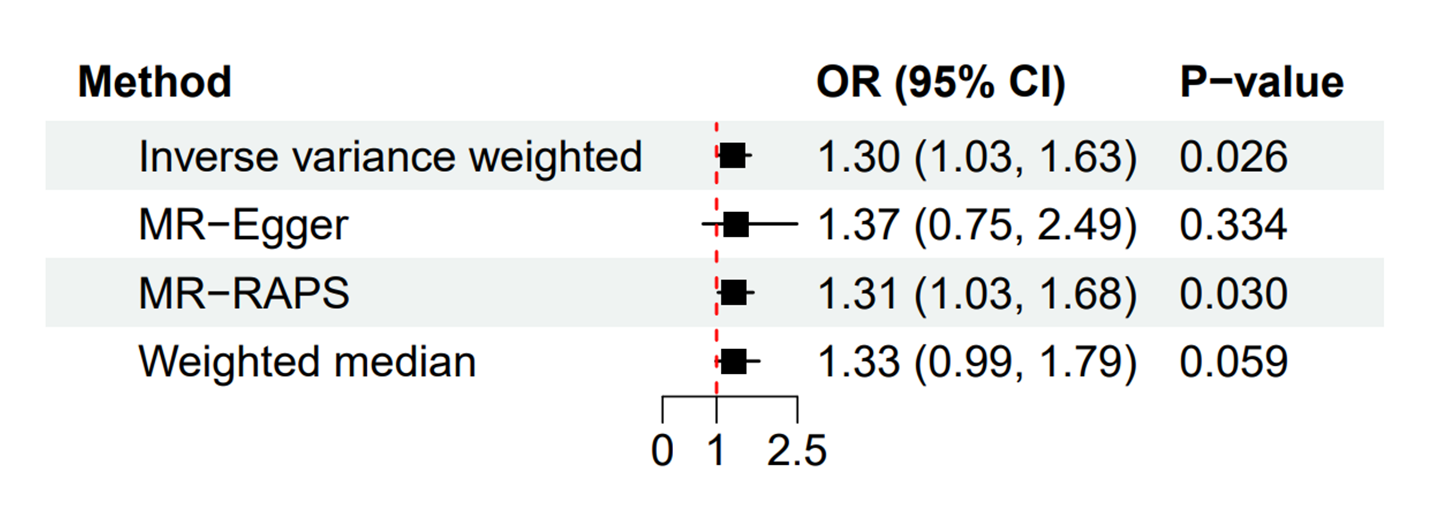


**Supplementary Figure S3 |** The Mendel Randomization Analysis of disorder of the sleep-wake schedule on Primary Liver Cancer. **Abbreviations:** MR-RAPS: MR robust adjusted profile score.


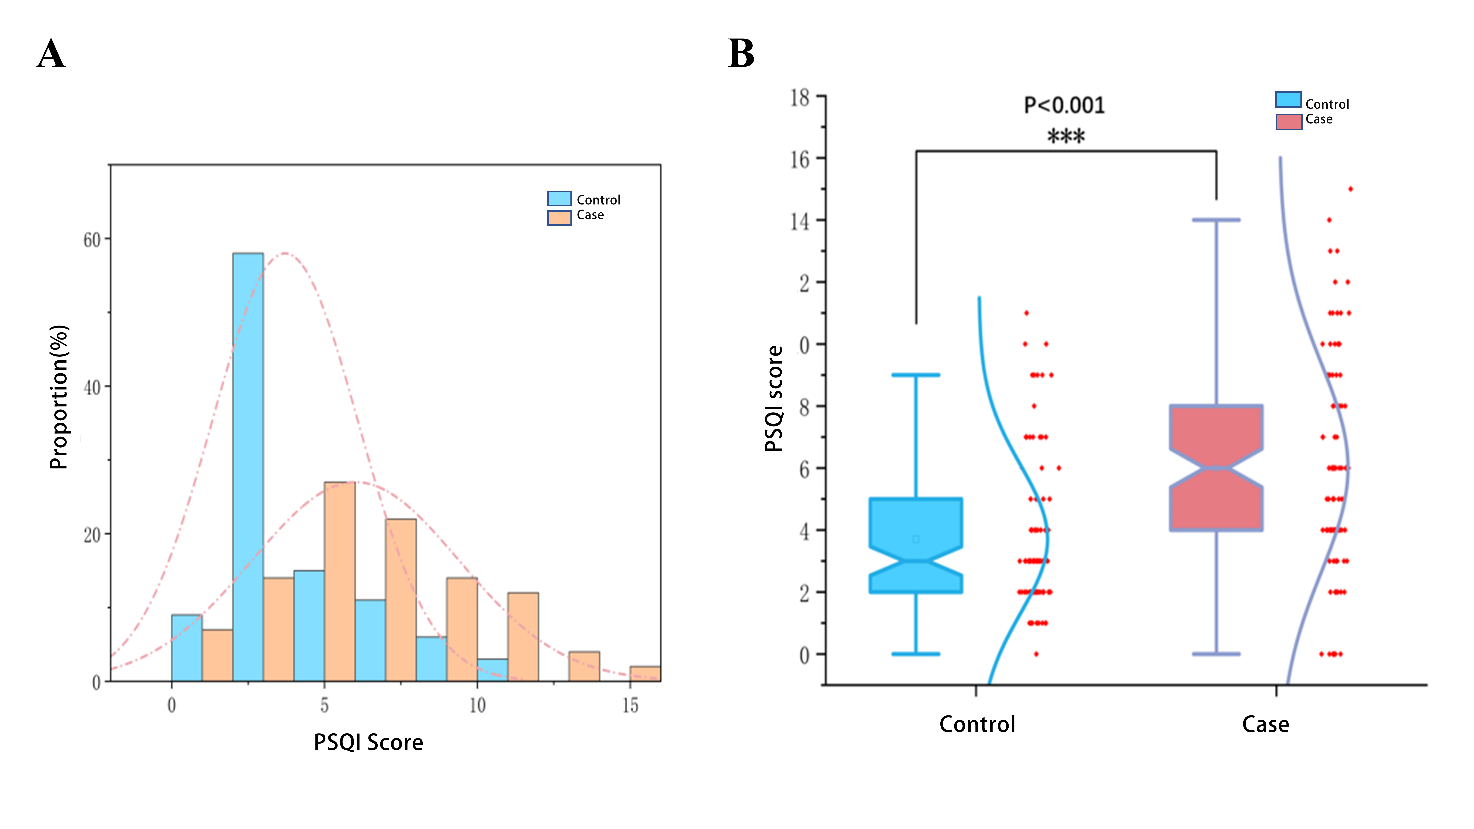


**Supplementary Figure S4 |** The distribution and differences description of PSQI score between individuals with and without Primary Liver Cancer. **A.** PSQI score distribution; **B.** Description of PSQI score difference between two groups. ***: *P*< 0.001. **Abbreviation:** PSQI Score: Pittsburgh Sleep Quality Index Score.


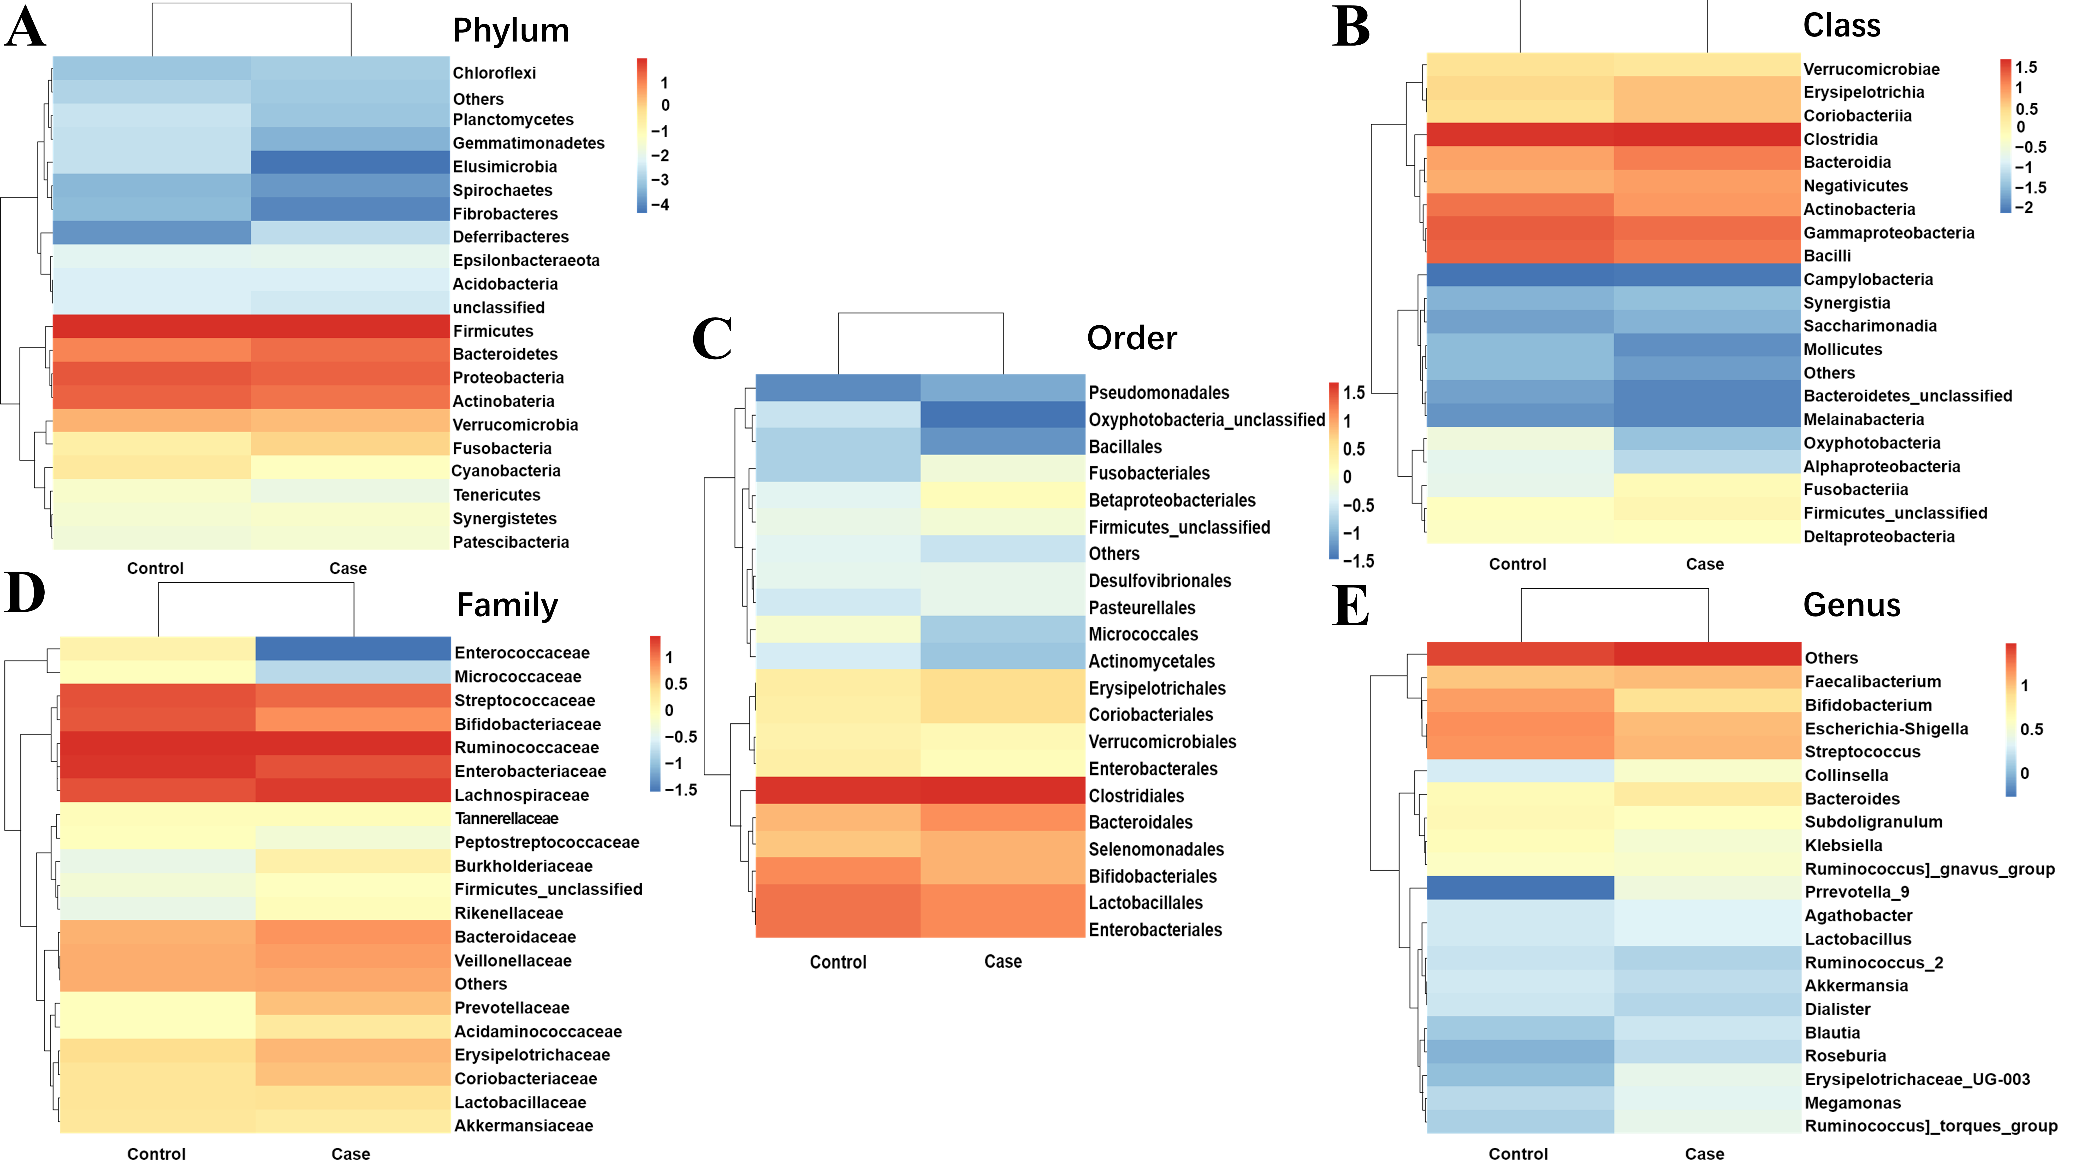


**Supplementary Figure S5 |** Dominant species at each level of gut microbiota between individuals with and without Primary Liver Cancer. **A.** Top 20 dominant flora at Phylum level; **B.** Top 20 dominant flora at Class level; **C.** Top 20 dominant flora at Order level; **D.** Top 20 dominant flora at Family level; **E.** Top 20 dominant flora at Genus level.


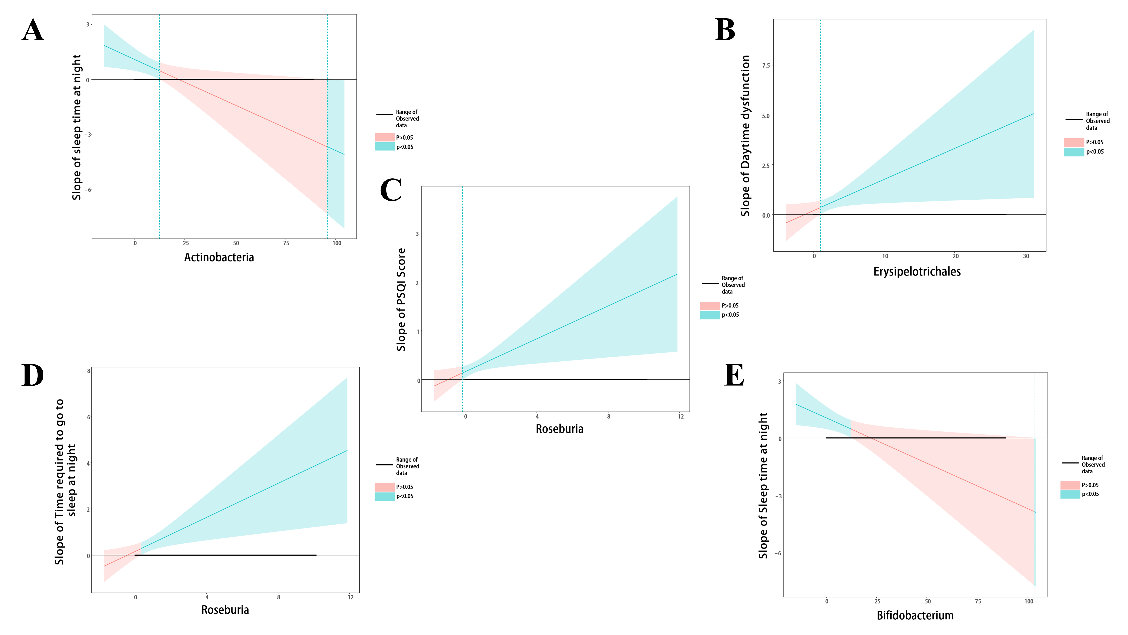


**Supplementary Figure S6 |** The moderation effect of gut microbiota on the relationship between sleep quality and Primary Liver Cancer by Johnson Neyman method. **A.** Test of the regulatory effect of *Actinobacteria*; **B.** Test of the regulatory effect of *Erysipelotrichales*; **C-D.** Test of the regulatory effect of *Roseburia*; **E.** Test of the regulatory effect of *Bifidobacterium*.

**Supplementary Table S1** **|** The sources for all statistical summary datasets used in this study.

| **Phenotype** | **Sample size** | **Case** | **Control** | **Source** | **PubMed ID** | **Population** |
| --- | --- | --- | --- | --- | --- | --- |
| Disorder of the sleep-wake schedule  (ICD-10: F51.2, G47.2) | 371,555 | 410 | 371,145 | <https://r9.finngen.fi/> | NA | European |
| Primary liver cancer  (PheCode 155.1) | 456,348 | 128 | 456,220 | <https://www.ebi.ac.uk/gwas/> | 34737426 | European |

**Supplementary Table S2 |** Characteristics of SNPs extracted from exposure (disorder of the sleep-wake schedule) GWAS statistical summary data.

| **SNP** | **Chromosome: Position** | **EA** | **OA** | **EAF** | ***F-Statistic*** | **Association with exposure** | |
| --- | --- | --- | --- | --- | --- | --- | --- |
| **Beta (SE)** | ***P-value*** |
| rs4507983 | 1:89240610 | T | A | 0.6685 | 20.6900 | 0.3914 (0.0860) | 5.40E-06 |
| rs4501174 | 4:158876994 | T | C | 0.0212 | 22.3992 | 0.9444 (0.1996) | 2.21E-06 |
| rs4639134 | 4:187418733 | C | A | 0.0180 | 21.0457 | 0.9967 (0.2173) | 4.48E-06 |
| rs79942405 | 11:108510917 | C | T | 0.0312 | 19.5368 | 0.7645 (0.1730) | 9.87E-06 |
| rs188186330 | 13:89451398 | T | C | 0.0145 | 19.6738 | 1.0292 (0.2320) | 9.19E-06 |
| rs8038415 | 15:98956205 | C | T | 0.4666 | 20.8665 | 0.3505 (0.0767) | 4.92E-06 |
| rs142399152 | 16:3419875 | C | G | 0.0249 | 21.7678 | 0.8714 (0.1868) | 3.08E-06 |
| rs62067360 | 17:17346616 | T | C | 0.0163 | 19.9920 | 1.0050 (0.2248) | 7.78E-06 |
| rs72971551 | 19:1764931 | T | C | 0.1238 | 21.6226 | 0.4841 (0.1041) | 3.32E-06 |
| rs2223946 | 20:15323402 | G | A | 0.0981 | 22.1258 | -0.7279 (0.1547) | 2.55E-06 |
| rs142125712 | 22:37881512 | A | G | 0.0219 | 20.8848 | 0.8917 (0.1951) | 4.88E-06 |

**Abbreviations:** SNP: single nucleotide polymorphism; EA: effect Allele; OA: other Allele; EFA: effect allele frequency; SE: standard error; *F-Statistic: F = (βexposure/SEexposure)2*.

**Supplementary Table S3 |** Details of phenotypes related to 11 instrumental variables found on the Phenoscanner website.

| **SNP** | **Trait & Source** | **Gene** | **Position (hg19):** |
| --- | --- | --- | --- |
| rs4507983 | NA | GBP5 | chr1:89706293 |
| rs4501174 | NA | FNIP2 | chr4:159798146 |
| rs4639134 | Cause of death: home (UKBB); Self-reported plantar fascitis (UKBB) | RP11-91J3.3 | chr4:188339887 |
| rs79942405 | NA | EXPH5 | chr11:108381644 |
| rs188186330 | Ulcer of lower limb (UKBB) | LINC01040 | chr13:90103652 |
| rs8038415 | Height (UKBB) | IGF1R | chr15:99499434 |
| rs142399152 | NA | LA16c-306E5.2 | chr16:3469875 |
| rs62067360 | NA | NT5M | chr17:17249930 |
| rs72971551 | NA | ONECUT3 | chr19:1764930 |
| rs2223946 | NA | MACROD2 | chr20:15304048 |
| rs142125712 | Cause of death: subarachnoid haemorrhage from intracranial artery, unspecified (UKBB); Cause of death: unspecified place (UKBB) | EIF3L | chr22:38277519 |

**Abbreviations:** UKBB: UK Biobank.

**Supplementary Table S4 |** Sensitivity Analysis of Mendel Randomization Results.

| **Method** | **Cochran’s Q test *P-value*** | **Pleiotropy test *P-value*** | **MR-PRESSO test *P-value*** |
| --- | --- | --- | --- |
| MR Egger | 0.617 | 0.857 | 0.752 |
| Inverse variance weighted | 0.704 |

| **Supplementary Table S5 |** Comparison of basic information between individuals with and without Primary Liver Cancer (before and after PSM). | | | | | | | |
| --- | --- | --- | --- | --- | --- | --- | --- |
| **Characteristics** | **Before PSM** | | |  | **After PSM** | | | |
| **Control** | **Case** | ***P-value*** |  | **Control** | **Case** | ***P-value*** | |
| **(N=145)** | **(N=173)** |  | **(N=102)** | **(N=102)** |
| Age (year),‾x ± s | 48.32 ± 12.72 | 58.01 ± 11.21 | **<0.001** |  | 51.63 ± 11.69 | 54.81 ± 12.41 | 0.061 | |
| Gender, n (%) |  |  | **<0.001** |  |  |  | 0.344 | |
| Female | 62 (42.8) | 28 (16.2) |  |  | 31 (30.4) | 24 (23.5) |
| Male | 83 (57.2) | 145 (83.8) |  |  | 71 (69.6) | 78 (76.5) |
| BMI (kg/m2),‾x ± s | 22.93 ± 3.31 | 23.42 ± 2.78 | 0.160 |  | 23.10 ± 3.25 | 23.07 ± 2.82 | 0.956 | |
| Diet, n (%) |  |  | 0.315 |  |  |  | 0.866 | |
| Meat Diet | 14 (9.7) | 24 (13.9) |  |  | 9 (8.8) | 11 (10.8) |  | |
| Vegetarian Diet | 29 (20.0) | 26 (15.0) |  | 20 (19.6) | 21 (20.6) |
| Balanced Diet | 102 (70.3) | 123 (71.1) |  | 73 (71.6) | 70 (68.6) |
| Smoking, n (%) |  |  | **<0.001** |  |  |  | 0.223 | |
| Never Smoke | 90 (62.1) | 63 (36.4) |  |  | 54 (52.9) | 45 (44.1) |  | |
| Current Smoking | 40 (27.6) | 85 (49.1) |  | 33 (32.4) | 45 (44.1) |
| Quit Smoking | 15 (10.3) | 25 (14.5) |  | 15 (14.7) | 12 (11.8) |
| Alcohol, n (%) |  |  | **<0.001** |  |  |  | 0.170 | |
| Never Drink | 107 (73.8) | 75 (43.4) |  |  | 66 (64.7) | 56 (54.9) |  | |
| Current Drinking | 23 (15.9) | 71 (41.0) |  | 22 (21.6) | 34 (33.3) |
| Quit Drinking | 15 (10.3) | 27 (15.6) |  | 14 (13.7) | 12 (11.8) |
| Hepatitis B, n (%) |  |  | **0.001** |  |  |  | 0.091 | |
| N | 61 (42.1) | 42 (24.3) |  |  | 36 (35.3) | 24 (23.5) |  | |
| Y | 84 (57.9) | 131 (75.7) |  |  | 66 (64.7) | 78 (76.5) |  | |
| Cirrhosis, n (%) |  |  | **0.005** |  |  |  | 0.068 | |
| N | 66 (45.5) | 51 (29.5) |  |  | 54 (52.9) | 40 (39.2) |  | |
| Y | 79 (54.5) | 122 (70.5) |  |  | 48 (47.1) | 62 (60.8) |  | |
| PSQI Score,‾x ± s | 3.62 ± 2.28 | 5.61 ± 3.26 | **<0.001** |  | 3.71 ± 2.39 | 6.01 ± 3.39 | **<0.001** | |

**Abbreviation:** BMI: Body Mass Index; PSM: propensity score matching; PSQI: Pittsburgh sleep quality index.

**Supplementary Table S6 |** Clinicopathological features of individuals with and without Primary Liver Cancer.

| **Characteristics** | **Control**  **(N=102)** | **Case**  **(N=102)** | ***P-value*** |
| --- | --- | --- | --- |
| Age (year) ,‾x ± s | 51.63 ± 11.69 | 54.81 ± 12.41 | 0.061 |
| Gender, n (%) |  |  | 0.344 |
| Female | 31 (30.4) | 24 (23.5) |  |
| Male | 71 (69.6) | 78 (76.5) |  |
| Hepatitis B, n (%) |  |  | 0.091 |
| No | 36 (35.3) | 24 (23.5) |  |
| Yes | 66 (64.7) | 78 (76.5) |  |
| Cirrhosis, n (%) |  |  | 0.068 |
| No | 54 (52.9) | 40 (39.2) |  |
| Yes | 48 (47.1) | 62 (60.8) |  |
| AFP (ng/mL), n (%) |  |  | **<0.001** |
| ≤200 | 100 (98.0) | 74 (72.5) |  |
| >200 | 2 (2.0) | 28 (27.5) |  |
| CEA (ng/mL), n (%) |  |  | 0.805 |
| ≤5 | 92 (90.2) | 94 (92.2) |  |
| >5 | 10 (9.8) | 8 (7.8) |  |
| CA199 (ng/mL), n (%) |  |  | 1.000 |
| ≤35 | 87 (85.3) | 86 (84.3) |  |
| >35 | 15 (14.7) | 16 (15.7) |  |
| TBIL (μmol/L), median (range) | 14 [10; 21.75] | 11 [8; 16] | **0.002†** |
| ALB (g/L), median (range) | 40.4 [36.8; 43.45] | 39.5 [36.55; 41.65] | 0.227† |
| ALT (μmol/L), median (range) | 35 [22; 77.75] | 29 [22; 40] | **0.024†** |
| AST (μmol/L), median (range) | 34.5 [25; 81.75] | 35 [25; 51] | 0.668† |
| PT (s), median (range) | 13.25 [12.8; 14.1] | 13.6 [13.1; 14.4] | **0.035†** |
| Child-Pugh, n (%) |  |  | **0.013** |
| A | 85 (83.3) | 97 (95.1) |  |
| B | 17 (16.7) | 5 (4.9) |  |
| TNM Stage, n (%) |  |  | —— |
| Ⅰ | —— | 54 (52.9) |  |
| Ⅱ | —— | 16 (15.7) |  |
| Ⅲ | —— | 12 (11.8) |  |
| Ⅳ | —— | 20 (19.6) |  |

**Abbreviation:** BMI: Body Mass Index; AFP: Alpha Fetoprotein; CEA: Carcinoembryonic Antigen; CA199: Carbohydrate Antigen199; TBIL: Total Bilirubin; ALB: Albumin; ALT: Alanine aminotransferase; AST: Aspartate Transaminase; PT: Prothrombin Time; † : Mann-Whitney U test.

| **Supplementary Table S7 |** Analysis of sleep status between individuals with and without Primary Liver Cancer. | | | | |
| --- | --- | --- | --- | --- |
| **Sleep status** |  | **Control** | **Case** | ***P-value*** |
| Self sleep quality assessment,‾x ± s |  | 1.01 ± 0.61 | 1.32 ± 0.73 | **0.001** |
| Time required to go to sleep at night,‾x ± s |  | 0.75 ± 1.07 | 1.26 ± 1.15 | **0.001** |
| Sleep time at night,‾x ± s |  | 0.32 ± 0.63 | 0.65 ± 0.80 | **0.002** |
| Sleep efficiency,‾x ± s |  | 0.04 ± 0.24 | 0.15 ± 0.53 | 0.064 |
| Nocturnal sleep disorder,‾x ± s |  | 0.92 ± 0.36 | 1.37 ± 0.70 | **<0.001** |
| Use of hypnotic drugs,‾x ± s |  | 0.07 ± 0.43 | 0.05 ± 0.36 | 0.722 |
| Daytime dysfunction,‾x ± s |  | 0.60 ± 0.87 | 1.13 ± 1.04 | **<0.001** |
| PSQI Score,‾x ± s |  | 3.71 ± 2.39 | 6.01 ± 3.39 | **<0.001** |

**Abbreviation:** PSQI Score: Pittsburgh Sleep Quality Index Score.

**Supplementary Table S8 |** The mediation and moderation effects of various levels of gut microbiota on the relationship between self sleep quality assessment and Primary Liver Cancer.

| **Level** | **Gut microbiota** | **Mediation Effect** | | | **Moderation Effect** | | |
| --- | --- | --- | --- | --- | --- | --- | --- |
| **Estimate** | **[95% CI]** | ***P-value*** | **Estimate** | **[95% CI]** | ***P-value*** |
| Phylum | *Firmicutes* | 0.003 | [-0.006, 0.019] | 0.559 | -0.008 | [-0.028, 0.013] | 0.459 |
| *Proteobacteria* | 0.006 | [-0.003, 0.015] | 0.628 | 0.005 | [-0.279, 0.288] | 0.975 |
| *Actinobacteria* | 0.007 | [-0.004, 0.030] | 0.388 | 0.010 | [-0.022, 0.042] | 0.549 |
| *Bacteroidetes* | 0.014 | [-0.007, 0.042] | 0.307 | 0.002 | [-0.051, 0.056] | 0.931 |
| *Verrucomicrobia* | 0.002 | [-0.004, 0.008] | 0.950 | 0.034 | [-0.065, 0.133] | 0.498 |
| *Fusobacteria* | -0.007 | [-0.019, 0.002] | 0.248 | 0.538 | [-1.102, 2.179] | 0.520 |
| *Cyanobacteria* | 0.014 | [-0.002, 0.080] | 0.596 | 0.057 | [-2.654, 2.769] | 0.967 |
| *Synergistetes* | 0.002 | [-0.004, 0.006] | 0.890 | -2.033 | [-12.901, 8.835] | 0.714 |
| *Tenericutes* | -0.003 | [-0.020, 0.011] | 0.991 | -15.199 | [-32.182, 1.785] | 0.079 |
| *Patescibacteria* | -0.002 | [-0.025, 0.005] | 0.782 | -1.648 | [-12.528, 9.233] | 0.767 |
| *Epsilonbacteraeota* | -0.010 | [-0.039, 0.009] | 0.436 | -0.948 | [-2.638, -0.258] | 0.037 |
| *Acidobacteria* | -0.002 | [-0.011, 0.009] | 0.914 | -1.977 | [-6.485, 3.530] | 0.580 |
| *unclassified* | -0.003 | [-0.021, 0.019] | 0.832 | 0.641 | [-2.575, 2.858] | 0.959 |
| *Planctomycetes* | 0.017 | [-0.003, 0.037] | 0.109 | -0.063 | [-0.368, 0.241] | 0.683 |
| *Gemmatimonadetes* | 0.020 | [0.002, 0.054] | 0.107 | -1.529 | [-3.294, 1.236] | 0.457 |
| *Elusimicrobia* | -0.011 | [-0.074, 0.071] | 0.998 | -0.275 | [-0.782, 0.233] | 0.289 |
| *Deferribacteres* | -0.014 | [-0.041, -0.002] | 0.214 | 0.009 | [-0.324, 0.342] | 0.957 |
| *Chloroflexi* | -0.004 | [-0.019, 0.008] | 0.583 | -0.006 | [-0.292, 0.280] | 0.967 |
| *Spirochaetes* | 0.005 | [-0.006, 0.093] | 0.854 | 1.057 | [-3.721, 5.835] | 0.720 |
| *Fibrobacteres* | -0.003 | [-0.061, 0.030] | 0.906 | -2.069 | [-9.049, 3.912] | 0.380 |
| Class | *Clostridia* | 0.008 | [-0.006, 0.026] | 0.355 | -0.007 | [-0.027, 0.013] | 0.486 |
| *Gammaproteobacteria* | 0.003 | [-0.003, 0.016] | 0.635 | 0.002 | [-0.023, 0.023] | 0.993 |
| *Bacilli* | 0.005 | [-0.006, 0.022] | 0.464 | -0.008 | [-0.026, 0.011] | 0.415 |
| *Actinobacteria* | 0.018 | [0.001, 0.052] | 0.177 | -0.003 | [-0.039, 0.033] | 0.874 |
| *Bacteroidia* | 0.014 | [-0.007, 0.042] | 0.304 | 0.002 | [-0.051, 0.056] | 0.928 |
| *Negativicutes* | 0.003 | [-0.005, 0.013] | 0.957 | 0.070 | [-0.025, 0.165] | 0.149 |
| *Erysipelotrichia* | 0.015 | [-0.003, 0.045] | 0.284 | 0.040 | [-0.149, 0.229] | 0.676 |
| *Coriobacteriia* | 0.011 | [0.001, 0.043] | 0.352 | 0.072 | [-0.084, 0.229] | 0.365 |
| *Verrucomicrobiae* | 0.003 | [-0.004, 0.008] | 0.950 | 0.034 | [-0.065, 0.133] | 0.498 |
| *Firmicutes_unclassified* | 0.004 | [-0.008, 0.017] | 0.533 | -0.393 | [-1.077, 0.290] | 0.260 |
| *Deltaproteobacteria* | 0.003 | [-0.004, 0.009] | 0.949 | 0.064 | [-0.527, 0.655] | 0.832 |
| *Fusobacteriia* | -0.007 | [-0.019, 0.002] | 0.248 | 0.538 | [-1.102, 2.179] | 0.520 |
| *Oxyphotobacteria* | 0.012 | [-0.005, 0.082] | 0.653 | -0.310 | [-3.536, 2.915] | 0.851 |
| *Alphaproteobacteria* | 0.033 | [-0.003, 0.076] | 0.149 | -3.544 | [-7.171, 0.082] | 0.055 |
| *Synergistia* | -0.003 | [-1.236, 2.368] | 0.736 | 1.012 | [-3.168, 5.287] | 0.786 |
| *Mollicutes* | -0.003 | [-0.020, 0.011] | 0.991 | -15.199 | [-32.182, 1.785] | 0.079 |
| *Saccharimonadia* | -0.002 | [-0.025, 0.005] | 0.789 | -1.654 | [-12.571, 9.263] | 0.766 |
| *Bacteroidetes_unclassified* | 0.009 | [-0.016, 0.042] | 0.522 | -0.097 | [-0.397, 0.203] | 0.526 |
| *Melainabacteria* | 0.006 | [-0.007, 0.023] | 0.981 | 7.119 | [-15.177, 29.415] | 0.531 |
| *Campylobacteria* | -0.010 | [-0.039, 0.009] | 0.436 | -0.071 | [-0.363, 0.223] | 0.640 |
| Order | *Clostridiales* | 0.008 | [-0.006, 0.026] | 0.355 | -0.007 | [-0.027, 0.013] | 0.486 |
| *Lactobacillales* | 0.005 | [-0.007, 0.022] | 0.474 | -0.008 | [-0.026, 0.011] | 0.414 |
| *Enterobacteriales* | 0.001 | [-0.006, 0.016] | 0.834 | 0.001 | [-0.023, 0.024] | 0.946 |
| *Bifidobacteriales* | 0.015 | [-0.001, 0.048] | 0.223 | -0.003 | [-0.038, 0.033] | 0.877 |
| *Bacteroidales* | 0.014 | [-0.007, 0.042] | 0.302 | 0.003 | [-0.051, 0.056] | 0.927 |
| *Selenomonadales* | 0.001 | [-0.005, 0.013] | 0.957 | 0.070 | [-0.025, 0.165] | 0.149 |
| *Erysipelotrichales* | 0.015 | [-0.003, 0.045] | 0.284 | 0.040 | [-0.149, 0.229] | 0.676 |
| *Coriobacteriales* | 0.011 | [0.000, 0.043] | 0.353 | 0.073 | [-0.085, 0.231] | 0.362 |
| *Verrucomicrobiales* | 0.001 | [-0.004, 0.008] | 0.951 | 0.034 | [-0.065, 0.133] | 0.499 |
| *Enterobacterales* | 0.004 | [-0.004, 0.014] | 0.322 | -0.021 | [-0.274, 0.231] | 0.868 |
| *Betaproteobacteriales* | -0.004 | [-0.019, 0.013] | 0.624 | -0.227 | [-1.041, 0.587] | 0.585 |
| *Firmicutes_unclassified* | 0.004 | [-0.008, 0.017] | 0.533 | -0.393 | [-1.077, 0.290] | 0.260 |
| *Micrococcales* | 0.013 | [-0.006, 0.029] | 0.154 | -1.632 | [-3.613, 0.349] | 0.106 |
| *Desulfovibrionales* | 0.001 | [-0.004, 0.009] | 0.942 | 0.062 | [-0.529, 0.652] | 0.838 |
| *Fusobacteriales* | -0.007 | [-0.019, 0.002] | 0.248 | 0.538 | [-1.102, 2.179] | 0.520 |
| *Pasteurellales* | -0.004 | [-0.017, 0.003] | 0.576 | 0.331 | [-0.573, 1.235] | 0.473 |
| *Actinomycetales* | 0.014 | [-0.001, 0.030] | 0.140 | -0.603 | [-3.522, 2.316] | 0.686 |
| *Oxyphotobacteria_unclassified* | 0.012 | [-0.005, 0.086] | 0.651 | -0.294 | [-3.554, 2.965] | 0.860 |
| *Bacillales* | 0.027 | [-0.002, 0.077] | 0.202 | -0.321 | [-4.155, 3.514] | 0.870 |
| *Pseudomonadales* | -0.001 | [-0.006, 0.035] | 0.925 | -1.497 | [-10.175, 7.181] | 0.735 |
| Family | *Ruminococcaceae* | 0.001 | [-0.012, 0.017] | 0.930 | -0.006 | [-0.033, 0.021] | 0.650 |
| *Enterobacteriaceae* | 0.003 | [-0.003, 0.018] | 0.678 | 0.001 | [-0.022, 0.024] | 0.926 |
| *Lachnospiraceae* | 0.007 | [-0.009, 0.020] | 0.378 | -0.008 | [-0.038, 0.022] | 0.594 |
| *Streptococcaceae* | 0.003 | [-0.006, 0.016] | 0.582 | -0.006 | [-0.028, 0.016] | 0.602 |
| *Bifidobacteriaceae* | 0.015 | [-0.001, 0.048] | 0.223 | -0.003 | [-0.038, 0.033] | 0.877 |
| *Bacteroidaceae* | 0.004 | [-0.006, 0.023] | 0.583 | 0.004 | [-0.077, 0.085] | 0.924 |
| *Veillonellaceae* | 0.003 | [-0.003, 0.011] | 0.976 | 0.054 | [-0.038, 0.146] | 0.248 |
| *Erysipelotrichaceae* | 0.015 | [-0.003, 0.045] | 0.284 | 0.040 | [-0.149, 0.229] | 0.676 |
| *Coriobacteriaceae* | 0.009 | [-0.001, 0.038] | 0.414 | 0.091 | [-0.091, 0.273] | 0.327 |
| *Prevotellaceae* | 0.011 | [-0.025, 0.048] | 0.560 | -0.037 | [-0.263, 0.190] | 0.749 |
| *Lactobacillaceae* | -0.006 | [-0.026, 0.028] | 0.648 | -0.019 | [-0.099, 0.061] | 0.641 |
| *Akkermansiaceae* | -0.003 | [-0.004, 0.008] | 0.951 | 0.034 | [-0.065, 0.133] | 0.498 |
| *Acidaminococcaceae* | 0.001 | [-0.019, 0.027] | 0.962 | 0.250 | [-0.121, 0.621] | 0.187 |
| *Tannerellaceae* | -0.001 | [-0.007, 0.022] | 0.913 | 0.145 | [-0.260, 0.550] | 0.484 |
| *Burkholderiaceae* | -0.004 | [-0.020, 0.017] | 0.717 | -0.306 | [-1.170, 0.558] | 0.487 |
| *Peptostreptococcaceae* | 0.002 | [-0.004, 0.023] | 0.775 | 0.390 | [-0.608, 1.389] | 0.445 |
| *Firmicutes_unclassified* | 0.004 | [-0.008, 0.017] | 0.533 | -0.393 | [-1.077, 0.290] | 0.260 |
| *Enterococcaceae* | 0.010 | [0.005, 0.043] | 0.302 | -1.282 | [-7.678, 5.113] | 0.277 |
| *Rikenellaceae* | 0.022 | [0.002, 0.071] | 0.193 | 0.075 | [-0.609, 0.760] | 0.829 |
| *Micrococcaceae* | 0.013 | [-0.006, 0.029] | 0.155 | -1.626 | [-3.608, 0.355] | 0.108 |
| Genus | *Escherichia-Shigella* | 0.001 | [-0.010, 0.014] | 0.960 | -0.002 | [-0.026, 0.021 | 0.835 |
| *Streptococcus* | 0.003 | [-0.006, 0.016] | 0.583 | -0.006 | [-0.028, 0.016] | 0.611 |
| *Bifidobacterium* | 0.015 | [-0.001, 0.048] | 0.223 | -0.003 | [-0.038, 0.033] | 0.877 |
| *Faecalibacterium* | -0.001 | [-0.019, 0.017] | 0.936 | -0.003 | [-0.043, 0.037] | 0.880 |
| *Bacteroides* | 0.005 | [-0.004, 0.024] | 0.539 | 0.011 | [-0.073, 0.096] | 0.793 |
| *Subdoligranulum* | 0.001 | [-0.008, 0.006] | 0.765 | -0.019 | [-0.131, 0.094] | 0.746 |
| *Klebsiella* | 0.002 | [-0.003, 0.016] | 0.693 | 0.045 | [-0.047, 0.137] | 0.335 |
| *Ruminococcus_gnavus_group* | -0.001 | [-0.018, 0.005] | 0.913 | -0.002 | [-0.047, 0.042] | 0.913 |
| *Collinsella* | 0.009 | [-0.001, 0.038] | 0.415 | 0.090 | [-0.092, 0.273] | 0.332 |
| *Agathobacter* | 0.002 | [-0.004, 0.007] | 0.921 | 0.083 | [-0.098, 0.265] | 0.366 |
| *Lactobacillus* | -0.005 | [-0.026, 0.031] | 0.677 | -0.020 | [-0.099, 0.060] | 0.629 |
| *Megamonas* | 0.002 | [-0.007, 0.027] | 0.812 | 0.025 | [-0.081, 0.131] | 0.646 |
| *Ruminococcus_torques_group* | -0.006 | [-0.048, 0.020] | 0.731 | 0.032 | [-0.086, 0.150] | 0.597 |
| *Erysipelotrichaceae_UCG-003* | 0.018 | [-0.003, 0.065] | 0.352 | 0.047 | [-0.188, 0.283] | 0.694 |
| *Akkermansia* | 0.001 | [-0.004, 0.008] | 0.951 | 0.034 | [-0.065, 0.133] | 0.498 |
| *Prevotella_9* | 0.009 | [-0.019, 0.042] | 0.566 | 0.014 | [-0.203, 0.231] | 0.901 |
| *Dialister* | 0.001 | [-0.005, 0.014] | 0.880 | 0.140 | [-0.079, 0.360] | 0.209 |
| *Ruminococcus_2* | 0.001 | [-0.006, 0.004] | 0.891 | 0.004 | [-0.278, 0.287] | 0.976 |
| *Blautia* | 0.002 | [-0.009, 0.021] | 0.721 | -0.051 | [-0.269, 0.168] | 0.649 |
| *Roseburia* | 0.003 | [-0.021, 0.018] | 0.786 | 0.103 | [-0.197, 0.403] | 0.501 |

**Supplementary Table S9 |** The mediation and moderation effects of various levels of gut microbiota on the relationship between time required to go to sleep at night and Primary Liver Cancer.

| **Level** | **Gut microbiota** | **Mediation Effect** | | | **Moderation Effect** | | |
| --- | --- | --- | --- | --- | --- | --- | --- |
| **Estimate** | **[95% CI]** | ***P-value*** | **Estimate** | **[95% CI]** | ***P-value*** |
| Phylum | Firmicutes | 0.002 | [-0.003, 0.012] | 0.567 | 0.003 | [-0.009, 0.014] | 0.653 |
| Proteobacteria | 0.003 | [-0.002, 0.011] | 0.595 | -0.004 | [-0.018, 0.009] | 0.513 |
| Actinobacteria | 0.005 | [-0.002, 0.019] | 0.349 | -0.001 | [-0.019, 0.017] | 0.928 |
| Bacteroidetes | 0.010 | [-0.005, 0.025] | 0.247 | -0.017 | [-0.045, 0.011] | 0.225 |
| Verrucomicrobia | 0.011 | [-0.004, 0.018] | 0.957 | 0.020 | [-0.049, 0.089] | 0.578 |
| Fusobacteria | 0.005 | [-0.010, 0.024] | 0.573 | 0.218 | [-0.546, 0.982] | 0.576 |
| Cyanobacteria | 0.005 | [-0.007, 0.027] | 0.594 | -1.204 | [-3.124, 0.716] | 0.219 |
| Synergistetes | -0.001 | [-0.008, 0.004] | 0.881 | -1.178 | [-3.798, 1.443] | 0.378 |
| Tenericutes | -0.002 | [-0.021, 0.030] | 0.885 | -0.662 | [ -6.292, 4.967] | 0.818 |
| Patescibacteria | -0.004 | [-0.014, 0.004] | 0.380 | 11.505 | [-3.123, 26.134] | 0.123 |
| Epsilonbacteraeota | -0.003 | [-0.011, 0.005] | 0.459 | -5.278 | [-38.498, 27.942] | 0.755 |
| Acidobacteria | 0.001 | [-0.004, 0.006] | 0.923 | -3.341 | [-35.983, 29.301] | 0.841 |
| unclassified | 0.012 | [-0.006, 0.019] | 0.799 | -4.899 | [-13.153, 9.356] | 0.109 |
| Planctomycetes | 0.003 | [-0.013, 0.017] | 0.707 | -3.322 | [-16.109, 19.465] | 0.622 |
| Gemmatimonadetes | 0.008 | [-0.007, 0.029] | 0.386 | 3.146 | [-6.900, 13.192] | 0.515 |
| Elusimicrobia | 0.011 | [-0.014, 0.040] | 0.499 | 9.979 | [ -34.043, 34.086] | 0.730 |
| Deferribacteres | -0.001 | [-0.017, 0.008] | 0.855 | -11.322 | [-47.372, 32.728] | 0.269 |
| Chloroflexi | 0.003 | [-0.004, 0.010] | 0.978 | 3.763 | [-8.017, 15.543] | 0.947 |
| Spirochaetes | 0.016 | [-0.004, 0.038] | 0.987 | 2.168 | [-1.365, 3.782] | 0.988 |
| Fibrobacteres | 0.002 | [-0.027, 0.032] | 0.906 | -2.333 | [-6.578, 1.326] | 0.986 |
| Class | Clostridia | 0.003 | [-0.003, 0.013] | 0.449 | 0.002 | [-0.010, 0.013] | 0.786 |
| Gammaproteobacteria | 0.002 | [-0.002, 0.011] | 0.596 | -0.004 | [-0.018, 0.009] | 0.521 |
| Bacilli | 0.002 | [-0.008, 0.007] | 0.987 | -0.001 | [-0.011, 0.010] | 0.882 |
| Actinobacteria | 0.009 | [-0.004, 0.026] | 0.243 | -0.010 | [-0.030, 0.011] | 0.362 |
| Bacteroidia | 0.010 | [-0.005, 0.025] | 0.246 | -0.017 | [-0.045, 0.011] | 0.227 |
| Negativicutes | 0.001 | [-0.008, 0.010] | 0.938 | 0.033 | [-0.011, 0.078] | 0.141 |
| Erysipelotrichia | -0.005 | [-0.018, 0.012] | 0.554 | 0.012 | [-0.100, 0.125] | 0.829 |
| Coriobacteriia | 0.001 | [-0.003, 0.014] | 0.776 | 0.119 | [ 0.008, 0.231] | 0.036 |
| Verrucomicrobiae | 0.003 | [-0.004, 0.008] | 0.957 | 0.020 | [-0.049, 0.089] | 0.578 |
| Firmicutes_unclassified | 0.005 | [-0.003, 0.020] | 0.418 | 0.128 | [-0.239, 0.494] | 0.495 |
| Deltaproteobacteria | 0.002 | [-0.004, 0.006] | 0.948 | -0.020 | [-0.380, 0.341] | 0.915 |
| Fusobacteriia | 0.005 | [-0.010, 0.024] | 0.573 | 0.218 | [-0.546, 0.982] | 0.576 |
| Oxyphotobacteria | 0.006 | [-0.004, 0.031] | 0.621 | -0.953 | [-3.342, 1.436] | 0.434 |
| Alphaproteobacteria | 0.015 | [0.000, 0.044] | 0.204 | -1.793 | [-4.565, 0.979] | 0.205 |
| Synergistia | -0.002 | [-0.008, 0.004] | 0.881 | -1.178 | [-3.798, 1.443] | 0.378 |
| Mollicutes | -0.007 | [-0.021, 0.030] | 0.885 | -0.662 | [ -6.292, 4.967] | 0.818 |
| Saccharimonadia | -0.004 | [-0.014, 0.003] | 0.379 | 11.777 | [-2.960, 26.514] | 0.117 |
| Bacteroidetes_unclassified | 0.003 | [-0.006, 0.025] | 0.657 | -6.986 | [-19.213, 5.241] | 0.263 |
| Melainabacteria | -0.006 | [-0.017, 0.001] | 0.981 | 4.230 | [-11.677, 13.218] | 0.481 |
| Campylobacteria | -0.003 | [-0.011, 0.005] | 0.459 | -5.278 | [-38.498, 27.942] | 0.755 |
| Order | Clostridiales | 0.003 | [-0.003, 0.013] | 0.448 | 0.002 | [-0.010, 0.013] | 0.785 |
| Lactobacillales | 0.001 | [-0.008, 0.007] | 0.988 | -0.001 | [-0.011, 0.010] | 0.877 |
| Enterobacteriales | 0.001 | [-0.004, 0.010] | 0.751 | -0.006 | [-0.020, 0.008] | 0.396 |
| Bifidobacteriales | 0.007 | [-0.004, 0.024] | 0.297 | -0.010 | [-0.030, 0.011] | 0.357 |
| Bacteroidales | 0.010 | [-0.005, 0.025] | 0.245 | -0.017 | [-0.045, 0.011] | 0.228 |
| Selenomonadales | -0.003 | [-0.008, 0.010] | 0.939 | 0.033 | [-0.011, 0.078] | 0.141 |
| Erysipelotrichales | -0.005 | [-0.018, 0.012] | 0.554 | 0.012 | [-0.100, 0.125] | 0.829 |
| Coriobacteriales | 0.001 | [-0.002, 0.024] | 0.774 | 0.109 | [ 0.006, 0.233] | 0.023 |
| Verrucomicrobiales | 0.003 | [-0.004, 0.008] | 0.957 | 0.020 | [-0.049, 0.089] | 0.578 |
| Enterobacterales | 0.003 | [-0.001, 0.013] | 0.441 | 0.034 | [-0.053, 0.122] | 0.442 |
| Betaproteobacteriales | -0.001 | [-0.013, 0.005] | 0.799 | -0.100 | [-0.503, 0.304] | 0.628 |
| Firmicutes_unclassified | 0.005 | [-0.003, 0.020] | 0.418 | 0.128 | [-0.239, 0.494] | 0.495 |
| Micrococcales | 0.021 | [-0.019, 0.044] | 0.204 | -0.512 | [-1.604, 0.581] | 0.359 |
| Desulfovibrionales | 0.001 | [-0.004, 0.006] | 0.940 | -0.020 | [-0.381, 0.340] | 0.912 |
| Fusobacteriales | 0.005 | [-0.010, 0.024] | 0.573 | 0.218 | [-0.546, 0.982] | 0.576 |
| Pasteurellales | -0.002 | [-0.006, 0.004] | 0.588 | 0.126 | [-0.332, 0.585] | 0.589 |
| Actinomycetales | -0.009 | [-0.033, 0.015] | 0.514 | -0.590 | [-2.127, 0.946] | 0.451 |
| Oxyphotobacteria_unclassified | 0.005 | [-0.003, 0.032] | 0.617 | -1.003 | [-3.402, 1.397] | 0.413 |
| Bacillales | 0.003 | [-0.015, 0.027] | 0.792 | 0.636 | [-1.331, 2.604] | 0.526 |
| Pseudomonadales | -0.002 | [-0.010, 0.014] | 0.760 | -4.185 | [-8.507, 0.137] | 0.058 |
| Family | Ruminococcaceae | 0.001 | [-0.006, 0.009] | 0.847 | 0.003 | [-0.012, 0.018] | 0.675 |
| Enterobacteriaceae | 0.002 | [-0.004, 0.011] | 0.628 | -0.004 | [-0.018, 0.009] | 0.527 |
| Lachnospiraceae | 0.002 | [-0.008, 0.011] | 0.670 | -0.001 | [-0.021, 0.020] | 0.959 |
| Streptococcaceae | -0.002 | [-0.012, 0.004] | 0.677 | -0.001 | [-0.013, 0.012] | 0.934 |
| Bifidobacteriaceae | 0.007 | [-0.004, 0.024] | 0.297 | -0.010 | [-0.030, 0.011] | 0.357 |
| Bacteroidaceae | 0.005 | [-0.003, 0.020] | 0.419 | -0.013 | [-0.049, 0.023] | 0.483 |
| Veillonellaceae | -0.001 | [-0.005, 0.007] | 0.904 | 0.025 | [-0.017, 0.067] | 0.248 |
| Erysipelotrichaceae | 0.554 | [-0.018, 0.012] | -0.005 | 0.012 | [-0.100, 0.125] | 0.829 |
| Coriobacteriaceae | 0.001 | [-0.004, 0.012] | 0.886 | 0.139 | [ 0.015, 0.263] | 0.028 |
| Prevotellaceae | 0.003 | [-0.019, 0.025] | 0.784 | 0.146 | [-0.083, 0.375] | 0.210 |
| Lactobacillaceae | -0.001 | [-0.008, 0.012] | 0.845 | -0.015 | [-0.084, 0.053] | 0.660 |
| Akkermansiaceae | 0.003 | [-0.004, 0.008] | 0.957 | 0.020 | [-0.049, 0.089] | 0.578 |
| Acidaminococcaceae | 0.003 | [-0.007, 0.018] | 0.695 | 0.095 | [-0.109, 0.299] | 0.361 |
| Tannerellaceae | -0.001 | [-0.013, 0.003] | 0.817 | -0.146 | [-0.303, 0.010] | 0.067 |
| Burkholderiaceae | -0.001 | [-0.014, 0.007] | 0.877 | -0.094 | [-0.539, 0.351] | 0.679 |
| Peptostreptococcaceae | -0.002 | [-0.004, 0.010] | 0.905 | 0.218 | [-0.192, 0.628] | 0.298 |
| Firmicutes_unclassified | 0.005 | [-0.003, 0.020] | 0.418 | 0.128 | [-0.239, 0.494] | 0.495 |
| Enterococcaceae | 0.019 | [0.001, 0.045] | 0.106 | -2.414 | [-6.325, 1.497] | 0.226 |
| Rikenellaceae | 0.007 | [-0.010, 0.027] | 0.424 | 0.083 | [-0.312, 0.478] | 0.681 |
| Micrococcaceae | 0.021 | [-0.019, 0.044] | 0.204 | -0.515 | [-1.607, 0.577] | 0.355 |
| Genus | Escherichia-Shigella | 0.002 | [-0.004, 0.011] | 0.667 | -0.007 | [-0.022, 0.007] | 0.331 |
| Streptococcus | -0.002 | [-0.011, 0.004] | 0.682 | -0.001 | [-0.013, 0.012] | 0.932 |
| Bifidobacterium | 0.007 | [-0.004, 0.024] | 0.297 | -0.010 | [-0.030, 0.011] | 0.358 |
| Faecalibacterium | 0.001 | [-0.005, 0.008] | 0.888 | 0.016 | [-0.010, 0.042] | 0.222 |
| Bacteroides | 0.005 | [-0.003, 0.021] | 0.423 | -0.012 | [-0.048, 0.024] | 0.521 |
| Subdoligranulum | -0.001 | [-0.005, 0.006] | 0.909 | 0.017 | [-0.035, 0.070] | 0.518 |
| Klebsiella | 0.002 | [-0.003, 0.005] | 0.835 | 0.017 | [-0.026, 0.061] | 0.433 |
| Ruminococcus_gnavus_group | 0.001 | [-0.007, 0.005] | 0.986 | -0.009 | [-0.035, 0.017] | 0.492 |
| Collinsella | 0.003 | [-0.004, 0.012] | 0.882 | 0.138 | [ 0.015, 0.262] | 0.028 |
| Agathobacter | 0.002 | [-0.003, 0.008] | 0.891 | 0.038 | [-0.047, 0.122] | 0.384 |
| Lactobacillus | -0.001 | [-0.008, 0.013] | 0.870 | -0.014 | [-0.083, 0.054] | 0.681 |
| Megamonas | 0.001 | [-0.003, 0.019] | 0.881 | 0.020 | [-0.039, 0.079] | 0.508 |
| Ruminococcus_torques_group | -0.005 | [-0.024, 0.005] | 0.507 | 0.038 | [-0.094, 0.170] | 0.571 |
| Erysipelotrichaceae_UCG-003 | -0.001 | [-0.016, 0.019] | 0.890 | 0.014 | [-0.129, 0.158] | 0.847 |
| Akkermansia | 0.002 | [-0.004, 0.008] | 0.957 | 0.020 | [-0.049, 0.089] | 0.578 |
| Prevotella_9 | 0.002 | [-0.017, 0.019] | 0.827 | 0.111 | [-0.147, 0.368] | 0.401 |
| Dialister | 0.001 | [-0.007, 0.009] | 0.904 | 0.048 | [-0.044, 0.141] | 0.307 |
| Ruminococcus_2 | 0.002 | [-0.004, 0.005] | 0.903 | -0.030 | [-0.114, 0.055] | 0.490 |
| Blautia | -0.001 | [-0.013, 0.007] | 0.801 | -0.011 | [-0.159, 0.137] | 0.885 |
| Roseburia | 0.001 | [-0.009, 0.016] | 0.844 | 0.369 | [ 0.093, 0.645] | 0.009 |

**Supplementary Table S10 |** The mediation and moderation effects of various levels of gut microbiota on the relationship between sleep time at night and Primary Liver Cancer.

| **Level** | **Gut microbiota** | **Mediation Effect** | | | **Moderation Effect** | | |
| --- | --- | --- | --- | --- | --- | --- | --- |
| **Estimate** | **[95% CI]** | ***P-value*** | **Estimate** | **[95% CI]** | ***P-value*** |
| Phylum | *Firmicutes* | 0.004 | [-0.006, 0.021] | 0.515 | 0.010 | [-0.007, 0.027] | 0.250 |
| *Proteobacteria* | 0.001 | [-0.014, 0.017] | 0.931 | -0.006 | [-0.023, 0.012] | 0.529 |
| *Actinobacteria* | 0.008 | [-0.001, 0.018] | 0.227 | -0.032 | [-0.068, 0.005] | 0.088 |
| *Bacteroidetes* | 0.001 | [-0.020, 0.028] | 0.963 | 0.050 | [-0.021, 0.121] | 0.165 |
| *Verrucomicrobia* | -0.003 | [-0.015, 0.011] | 0.988 | -0.122 | [-0.267, 0.023] | 0.099 |
| *Fusobacteria* | -0.004 | [-0.023, 0.014] | 0.693 | 0.105 | [-0.608, 0.818] | 0.773 |
| *Cyanobacteria* | 0.007 | [-0.002, 0.030] | 0.516 | -1.783 | [-5.385, 1.819] | 0.332 |
| *Synergistetes* | -0.001 | [-0.010, 0.004] | 0.834 | -0.803 | [-6.977, 5.371] | 0.799 |
| *Tenericutes* | 0.003 | [-0.011, 0.034] | 0.750 | -7.232 | [-20.619, 6.155] | 0.290 |
| *Patescibacteria* | -0.001 | [-0.011, 0.003] | 0.806 | 1.300 | [-13.427, 16.026] | 0.863 |
| *Epsilonbacteraeota* | 0.001 | [-0.008, 0.006] | 0.944 | -3.766 | [-12.426, 12.894] | 0.068 |
| *Acidobacteria* | -0.002 | [-0.010, 0.007] | 0.876 | -4.613 | [-9.739, 10.514] | 0.121 |
| *unclassified* | -0.003 | [-0.009, 0.005] | 0.985 | -2.104 | [-9.400, 12.191] | 0.135 |
| *Planctomycetes* | 0.009 | [-0.009, 0.028] | 0.337 | -2.392 | [-8.604, 3.820] | 0.393 |
| *Gemmatimonadetes* | 0.023 | [0.006, 0.072] | 0.167 | 1.472 | [-4.517, 7.461] | 0.824 |
| *Elusimicrobia* | 0.051 | [0.024, 0.092] | 0.012 | 2.336 | [ -4.042, 8.713] | 0.913 |
| *Deferribacteres* | 0.005 | [-0.040, 0.038] | 0.767 | -1.844 | [-5.726, 2.037] | 0.430 |
| *Chloroflexi* | -0.001 | [-0.011, 0.002] | 0.842 | -2.730 | [-5.209, -1.250] | 0.041 |
| *Spirochaetes* | -0.006 | [-0.042, 0.009] | 0.636 | 0.683 | [-3.261, 5.627] | 0.736 |
| *Fibrobacteres* | -0.012 | [-0.105, -0.000] | 0.716 | -1.386 | [-13.929, 11.158] | 0.989 |
| Class | *Clostridia* | 0.006 | [-0.004, 0.024] | 0.400 | 0.016 | [-0.003, 0.035] | 0.098 |
| *Gammaproteobacteria* | 0.001 | [-0.014, 0.017] | 0.934 | -0.006 | [-0.023, 0.012] | 0.522 |
| *Bacilli* | 0.002 | [-0.004, 0.013] | 0.605 | -0.008 | [-0.026, 0.010] | 0.396 |
| *Actinobacteria* | 0.011 | [-0.002, 0.030] | 0.195 | -0.050 | [-0.092, -0.007] | 0.021 |
| *Bacteroidia* | 0.001 | [-0.019, 0.028] | 0.959 | 0.050 | [-0.021, 0.121] | 0.164 |
| *Negativicutes* | 0.002 | [-0.004, 0.013] | 0.705 | 0.012 | [-0.044, 0.069] | 0.674 |
| *Erysipelotrichia* | 0.012 | [-0.003, 0.044] | 0.383 | 0.048 | [-0.119, 0.216] | 0.572 |
| *Coriobacteriia* | -0.003 | [-0.016, 0.013] | 0.633 | 0.128 | [-0.058, 0.314] | 0.177 |
| *Verrucomicrobiae* | -0.002 | [-0.015, 0.011] | 0.988 | -0.122 | [-0.267, 0.023] | 0.099 |
| *Firmicutes_unclassified* | -0.001 | [-0.016, 0.010] | 0.914 | 0.252 | [-0.514, 1.018] | 0.520 |
| *Deltaproteobacteria* | 0.001 | [-0.004, 0.011] | 0.953 | 0.248 | [-0.465, 0.962] | 0.495 |
| *Fusobacteriia* | -0.004 | [-0.023, 0.014] | 0.693 | 0.105 | [-0.608, 0.818] | 0.773 |
| *Oxyphotobacteria* | 0.008 | [-0.006, 0.038] | 0.492 | -3.572 | [-8.421, 1.278] | 0.149 |
| *Alphaproteobacteria* | 0.029 | [0.002, 0.063] | 0.070 | -3.594 | [-7.809, -1.379] | 0.018 |
| *Synergistia* | -0.001 | [-0.010, 0.004] | 0.834 | -0.803 | [-6.977, 5.371] | 0.799 |
| *Mollicutes* | 0.003 | [-0.011, 0.034] | 0.750 | -7.232 | [-20.619, 6.155] | 0.290 |
| *Saccharimonadia* | -0.001 | [-0.011, 0.003] | 0.812 | 1.391 | [-13.393, 16.175] | 0.854 |
| *Bacteroidetes_unclassified* | 0.008 | [-0.007, 0.037] | 0.460 | -3.448 | [-6.068, 2.173] | 0.066 |
| *Melainabacteria* | -0.003 | [-0.008, 0.020] | 0.983 | 6.608 | [-12.325, 25.540] | 0.494 |
| *Campylobacteria* | -0.002 | [-0.008, 0.006] | 0.944 | -3.766 | [-8.426, 2.894] | 0.068 |
| Order | *Clostridiales* | 0.006 | [-0.004, 0.024] | 0.400 | 0.016 | [-0.003, 0.035] | 0.098 |
| *Lactobacillales* | 0.002 | [-0.004, 0.012] | 0.603 | -0.008 | [-0.026, 0.010] | 0.392 |
| *Enterobacteriales* | -0.001 | [-0.017, 0.016] | 0.868 | -0.007 | [-0.025, 0.010] | 0.420 |
| *Bifidobacteriales* | 0.009 | [-0.004, 0.025] | 0.258 | -0.048 | [-0.088, -0.007] | 0.022 |
| *Bacteroidales* | 0.001 | [-0.019, 0.028] | 0.955 | 0.051 | [-0.021, 0.122] | 0.163 |
| *Selenomonadales* | 0.002 | [-0.004, 0.013] | 0.705 | 0.012 | [-0.044, 0.069] | 0.674 |
| *Erysipelotrichales* | 0.012 | [-0.003, 0.044] | 0.383 | 0.048 | [-0.119, 0.216] | 0.572 |
| *Coriobacteriales* | -0.003 | [-0.016, 0.013] | 0.634 | 0.128 | [-0.058, 0.315] | 0.178 |
| *Verrucomicrobiales* | -0.001 | [-0.015, 0.011] | 0.989 | -0.122 | [-0.267, 0.023] | 0.100 |
| *Enterobacterales* | 0.003 | [-0.001, 0.021] | 0.617 | 0.256 | [-0.076, 0.589] | 0.131 |
| *Betaproteobacteriales* | -0.018 | [-0.044, 0.020] | 0.274 | 0.162 | [-0.682, 1.006] | 0.707 |
| *Firmicutes_unclassified* | -0.001 | [-0.016, 0.010] | 0.914 | 0.252 | [-0.514, 1.018] | 0.520 |
| *Micrococcales* | 0.030 | [0.002, 0.054] | 0.022 | -0.406 | [-2.528, 1.717] | 0.708 |
| *Desulfovibrionales* | 0.003 | [-0.004, 0.011] | 0.948 | 0.245 | [-0.469, 0.958] | 0.502 |
| *Fusobacteriales* | -0.004 | [-0.023, 0.014] | 0.693 | 0.105 | [-0.608, 0.818] | 0.773 |
| *Pasteurellales* | -0.003 | [-0.013, 0.005] | 0.485 | 0.163 | [-0.730, 1.057] | 0.720 |
| *Actinomycetales* | -0.013 | [-0.053, 0.019] | 0.468 | -0.191 | [-2.543, 2.162] | 0.874 |
| *Oxyphotobacteria_unclassified* | 0.008 | [-0.006, 0.038] | 0.467 | -3.756 | [-8.701, 1.188] | 0.136 |
| *Bacillales* | -0.005 | [-0.037, 0.030] | 0.760 | 1.499 | [-1.355, 4.352] | 0.303 |
| *Pseudomonadales* | -0.002 | [-0.014, 0.027] | 0.840 | -1.167 | [-2.668, -0.666] | 0.012 |
| Family | *Ruminococcaceae* | 0.001 | [-0.008, 0.019] | 0.861 | 0.014 | [-0.010, 0.037] | 0.264 |
| *Enterobacteriaceae* | -0.001 | [-0.017, 0.018] | 0.927 | -0.004 | [-0.022, 0.013] | 0.630 |
| *Lachnospiraceae* | 0.004 | [-0.004, 0.017] | 0.494 | 0.034 | [-0.009, 0.077] | 0.126 |
| *Streptococcaceae* | -0.003 | [-0.011, 0.008] | 0.998 | -0.011 | [-0.031, 0.009] | 0.299 |
| *Bifidobacteriaceae* | 0.009 | [-0.004, 0.025] | 0.258 | -0.036 | [-0.078, -0.007] | 0.016 |
| *Bacteroidaceae* | 0.003 | [-0.009, 0.026] | 0.757 | 0.098 | [-0.008, 0.203] | 0.069 |
| *Veillonellaceae* | 0.002 | [-0.004, 0.009] | 0.895 | -0.004 | [-0.058, 0.050] | 0.885 |
| *Erysipelotrichaceae* | 0.012 | [-0.003, 0.044] | 0.383 | 0.048 | [-0.119, 0.216] | 0.572 |
| *Coriobacteriaceae* | -0.005 | [-0.016, 0.008] | 0.471 | 0.205 | [-0.039, 0.450] | 0.100 |
| *Prevotellaceae* | -0.013 | [-0.045, 0.035] | 0.531 | 0.300 | [-0.340, 0.940] | 0.358 |
| *Lactobacillaceae* | -0.001 | [-0.008, 0.013] | 0.863 | -0.024 | [-0.116, 0.067] | 0.601 |
| *Akkermansiaceae* | 0.005 | [-0.015, 0.011] | 0.989 | -0.122 | [-0.267, 0.023] | 0.100 |
| *Acidaminococcaceae* | 0.011 | [-0.010, 0.056] | 0.455 | 1.023 | [ 0.166, 1.880] | 0.019 |
| *Tannerellaceae* | 0.002 | [-0.003, 0.007] | 0.985 | -0.029 | [-0.402, 0.345] | 0.881 |
| *Burkholderiaceae* | -0.020 | [-0.046, 0.023] | 0.284 | 0.398 | [-0.684, 1.479] | 0.471 |
| *Peptostreptococcaceae* | 0.002 | [-0.000, 0.030] | 0.783 | 0.695 | [-0.209, 1.600] | 0.132 |
| *Firmicutes_unclassified* | -0.001 | [-0.016, 0.010] | 0.914 | 0.252 | [-0.514, 1.018] | 0.520 |
| *Enterococcaceae* | 0.030 | [-0.259, 0.320] | 0.838 | -3.722 | [-9.698, 2.255] | 0.222 |
| *Rikenellaceae* | 0.024 | [0.003, 0.065] | 0.157 | 0.180 | [-0.523, 0.883] | 0.616 |
| *Micrococcaceae* | 0.032 | [0.002, 0.054] | 0.023 | -0.428 | [-2.551, 1.695] | 0.693 |
| Genus | *Escherichia-Shigella* | -0.002 | [-0.018, 0.014] | 0.837 | -0.011 | [-0.029, 0.007] | 0.231 |
| *Streptococcus* | -0.003 | [-0.011, 0.008] | 0.997 | -0.011 | [-0.031, 0.009] | 0.295 |
| *Bifidobacterium* | 0.009 | [-0.004, 0.025] | 0.258 | -0.038 | [-0.098, -0.006] | 0.012 |
| *Faecalibacterium* | 0.001 | [-0.010, 0.014] | 0.875 | 0.035 | [-0.015, 0.084] | 0.168 |
| *Bacteroides* | 0.003 | [-0.008, 0.026] | 0.741 | 0.099 | [-0.006, 0.205] | 0.065 |
| *Subdoligranulum* | -0.003 | [-0.016, 0.009] | 0.552 | 0.024 | [-0.040, 0.089] | 0.455 |
| *Klebsiella* | 0.001 | [-0.002, 0.017] | 0.822 | 0.081 | [-0.027, 0.189] | 0.141 |
| *Ruminococcus_gnavus_group* | -0.003 | [-0.012, 0.007] | 0.924 | 0.014 | [-0.047, 0.075] | 0.657 |
| *Collinsella* | -0.005 | [-0.016, 0.008] | 0.468 | 0.206 | [-0.040, 0.451] | 0.100 |
| *Agathobacter* | 0.002 | [-0.004, 0.008] | 0.964 | 0.159 | [-0.029, 0.346] | 0.098 |
| *Lactobacillus* | -0.001 | [-0.008, 0.014] | 0.885 | -0.023 | [-0.115, 0.068] | 0.618 |
| *Megamonas* | 0.002 | [-0.014, 0.030] | 0.819 | 0.002 | [-0.091, 0.090] | 0.995 |
| *Ruminococcus_torques_group* | -0.002 | [-0.023, 0.008] | 0.816 | -0.008 | [-0.167, 0.152] | 0.925 |
| *Erysipelotrichaceae_UCG-003* | 0.019 | [0.003, 0.063] | 0.252 | -0.005 | [-0.167, 0.158] | 0.955 |
| *Akkermansia* | -0.002 | [-0.015, 0.011] | 0.989 | -0.122 | [-0.267, 0.023] | 0.100 |
| *Prevotella_9* | -0.008 | [-0.036, 0.036] | 0.680 | 0.316 | [-0.455, 1.086] | 0.422 |
| *Dialister* | 0.002 | [-0.013, 0.014] | 0.942 | -0.064 | [-0.223, 0.095] | 0.433 |
| *Ruminococcus_2* | 0.001 | [-0.009, 0.016] | 0.826 | 0.127 | [-0.157, 0.411] | 0.381 |
| *Blautia* | 0.006 | [-0.004, 0.028] | 0.476 | 0.344 | [-0.088, 0.777] | 0.119 |
| *Roseburia* | 0.001 | [-0.018, 0.025] | 0.889 | 0.203 | [-0.135, 0.636] | 0.251 |

**Supplementary Table S11 |** The mediation and moderation effects of various levels of gut microbiota on the relationship between nocturnal sleep disorder and Primary Liver Cancer.

| **Level** | **Gut microbiota** | **Mediation Effect** | | | **Moderation Effect** | | |
| --- | --- | --- | --- | --- | --- | --- | --- |
| **Estimate** | **[95% CI]** | ***P-value*** | **Estimate** | **[95% CI]** | ***P-value*** |
| Phylum | *Firmicutes* | 0.003 | [-0.006, 0.017] | 0.563 | 0.009 | [-0.018, 0.035] | 0.533 |
| *Proteobacteria* | 0.003 | [-0.006, 0.016] | 0.636 | -0.005 | [-0.037, 0.026] | 0.737 |
| *Actinobacteria* | 0.009 | [-0.002, 0.028] | 0.323 | -0.007 | [-0.046, 0.032] | 0.733 |
| *Bacteroidetes* | 0.015 | [-0.008, 0.047] | 0.362 | 0.008 | [-0.046, 0.063] | 0.768 |
| *Verrucomicrobia* | -0.001 | [-0.013, 0.011] | 0.938 | -0.125 | [-0.368, 0.119] | 0.316 |
| *Fusobacteria* | 0.006 | [-0.017, 0.021] | 0.994 | 0.005 | [-0.919, 0.929] | 0.991 |
| *Cyanobacteria* | 0.002 | [-0.004, 0.017] | 0.683 | -4.845 | [-15.181, 5.491] | 0.358 |
| *Synergistetes* | -0.002 | [-0.008, 0.009] | 0.607 | 15.170 | [ -5.585, 35.925] | 0.152 |
| *Tenericutes* | 0.002 | [-0.005, 0.020] | 0.709 | 4.419 | [-33.252, 42.089] | 0.818 |
| *Patescibacteria* | 0.003 | [-0.009, 0.012] | 0.740 | 3.422 | [-12.458, 9.303] | 0.201 |
| *Epsilonbacteraeota* | -0.016 | [-0.037, 0.006] | 0.185 | 5.443 | [-6.093, 15.206] | 0.550 |
| *Acidobacteria* | -0.001 | [-0.005, 0.010] | 0.822 | 0.202 | [-11.032, 21.436] | 0.448 |
| *unclassified* | -0.003 | [-0.008, 0.005] | 0.891 | -6.698 | [-16.147, 19.751] | 0.171 |
| *Planctomycetes* | 0.011 | [0.001, 0.023] | 0.176 | -4.363 | [-10.061, 11.335] | 0.730 |
| *Gemmatimonadetes* | 0.012 | [0.003, 0.029] | 0.125 | -2.125 | [-9.152, 7.268] | 0.992 |
| *Elusimicrobia* | 0.026 | [0.009, 0.068] | 0.085 | 3.954 | [-3.907, 11.815] | 0.996 |
| *Deferribacteres* | -0.003 | [-0.026, 0.028] | 0.816 | 0.096 | [-0.246, 0.437] | 0.296 |
| *Chloroflexi* | -0.002 | [-0.013, 0.005] | 0.731 | -0.002 | [-0.300, 0.296] | 0.989 |
| *Spirochaetes* | 0.001 | [-0.002, 0.033] | 0.906 | 0.130 | [-15.994, 16.255] | 0.987 |
| *Fibrobacteres* | 0.002 | [-0.002, 0.030] | 0.809 | 1.341 | [-7.288, 11.968] | 0.991 |
| Class | *Clostridia* | 0.005 | [-0.003, 0.024] | 0.486 | 0.001 | [-0.025, 0.027] | 0.930 |
| *Gammaproteobacteria* | 0.003 | [-0.006, 0.016] | 0.631 | -0.005 | [-0.036, 0.026] | 0.736 |
| *Bacilli* | 0.004 | [-0.006, 0.025] | 0.618 | 0.002 | [-0.023, 0.028] | 0.856 |
| *Actinobacteria* | 0.018 | [0.002, 0.053] | 0.169 | -0.019 | [-0.059, 0.022] | 0.371 |
| *Bacteroidia* | 0.015 | [-0.008, 0.048] | 0.359 | 0.008 | [-0.046, 0.063] | 0.767 |
| *Negativicutes* | 0.004 | [-0.007, 0.024] | 0.543 | 0.020 | [-0.064, 0.104] | 0.642 |
| *Erysipelotrichia* | 0.006 | [-0.012, 0.025] | 0.557 | -0.042 | [-0.228, 0.144] | 0.657 |
| *Coriobacteriia* | 0.007 | [-0.002, 0.020] | 0.287 | 0.182 | [-0.139, 0.502] | 0.267 |
| *Verrucomicrobiae* | -0.003 | [-0.013, 0.011] | 0.938 | -0.125 | [-0.368, 0.119] | 0.316 |
| *Firmicutes_unclassified* | 0.007 | [-0.005, 0.024] | 0.381 | 0.060 | [-0.704, 0.824] | 0.877 |
| *Deltaproteobacteria* | -0.001 | [-0.010, 0.011] | 0.781 | 0.115 | [-0.743, 0.972] | 0.793 |
| *Fusobacteriia* | -0.005 | [-0.017, 0.021] | 0.994 | 0.005 | [-0.919, 0.929] | 0.991 |
| *Oxyphotobacteria* | 0.002 | [-0.003, 0.018] | 0.688 | -4.332 | [-14.859, 6.196] | 0.420 |
| *Alphaproteobacteria* | 0.024 | [0.001, 0.061] | 0.146 | -3.216 | [-11.467, 5.034] | 0.445 |
| *Synergistia* | -0.002 | [-0.008, 0.009] | 0.607 | 15.170 | [-5.585, 35.925] | 0.152 |
| *Mollicutes* | 0.002 | [-0.005, 0.020] | 0.709 | 4.419 | [-33.252, 42.089] | 0.818 |
| *Saccharimonadia* | 0.002 | [-0.009, 0.013] | 0.738 | 4.334 | [-3.616, 12.285] | 0.285 |
| *Bacteroidetes_unclassified* | 0.004 | [-0.032, 0.057] | 0.852 | 3.987 | [-10.499, 0.525] | 0.056 |
| *Melainabacteria* | -0.003 | [-0.017, 0.007] | 0.998 | 3.267 | [-4.560, 11.545] | 0.327 |
| *Campylobacteria* | -0.016 | [-0.037, 0.006] | 0.185 | -5.443 | [-12.093, 8.206] | 0.550 |
| Order | *Clostridiales* | 0.005 | [-0.003, 0.024] | 0.486 | 0.001 | [-0.025, 0.027] | 0.930 |
| *Lactobacillales* | 0.004 | [-0.006, 0.025] | 0.624 | 0.002 | [-0.023, 0.027] | 0.865 |
| *Enterobacteriales* | 0.003 | [-0.007, 0.022] | 0.644 | -0.005 | [-0.037, 0.026] | 0.737 |
| *Bifidobacteriales* | 0.015 | [-0.000, 0.044] | 0.220 | -0.020 | [-0.059, 0.019] | 0.317 |
| *Bacteroidales* | 0.015 | [-0.008, 0.048] | 0.357 | 0.008 | [-0.046, 0.063] | 0.766 |
| *Selenomonadales* | 0.004 | [-0.007, 0.024] | 0.543 | 0.020 | [-0.064, 0.104] | 0.642 |
| *Erysipelotrichales* | 0.006 | [-0.012, 0.025] | 0.557 | -0.042 | [-0.228, 0.144] | 0.657 |
| *Coriobacteriales* | 0.007 | [-0.002, 0.020] | 0.287 | 0.183 | [-0.139, 0.505] | 0.265 |
| *Verrucomicrobiales* | -0.003 | [-0.013, 0.011] | 0.937 | -0.125 | [-0.368, 0.119] | 0.316 |
| *Enterobacterales* | 0.001 | [-0.005, 0.009] | 0.986 | -0.004 | [-0.181, 0.173] | 0.967 |
| *Betaproteobacteriales* | -0.009 | [-0.024, 0.009] | 0.295 | -0.007 | [-1.308, 1.295] | 0.992 |
| *Firmicutes_unclassified* | 0.007 | [-0.005, 0.024] | 0.381 | 0.060 | [-0.704, 0.824] | 0.877 |
| *Micrococcales* | 0.038 | [0.009, 0.120] | 0.181 | 2.326 | [-0.692, 5.343] | 0.131 |
| *Desulfovibrionales* | -0.001 | [-0.010, 0.011] | 0.795 | 0.107 | [-0.749, 0.963] | 0.807 |
| *Fusobacteriales* | 0.006 | [-0.017, 0.021] | 0.994 | 0.005 | [-0.919, 0.929] | 0.991 |
| *Pasteurellales* | 0.002 | [-0.002, 0.036] | 0.847 | 0.403 | [-0.648, 1.453] | 0.453 |
| *Actinomycetales* | 0.008 | [-0.006, 0.027] | 0.444 | 4.977 | [0.008, 9.947] | 0.051 |
| *Oxyphotobacteria_unclassified* | 0.002 | [-0.002, 0.017] | 0.677 | -4.374 | [-14.887, 6.139] | 0.415 |
| *Bacillales* | 0.012 | [-0.006, 0.042] | 0.395 | 7.245 | [-0.248, 14.738] | 0.058 |
| *Pseudomonadales* | 0.006 | [-0.001, 0.019] | 0.961 | -0.187 | [-0.711, 0.337] | 0.484 |
| Family | *Ruminococcaceae* | 0.003 | [-0.013, 0.016] | 0.969 | 0.024 | [-0.014, 0.061] | 0.217 |
| *Enterobacteriaceae* | 0.004 | [-0.006, 0.023] | 0.616 | -0.006 | [-0.036, 0.025] | 0.724 |
| *Lachnospiraceae* | 0.006 | [-0.006, 0.021] | 0.396 | -0.038 | [-0.077, 0.002] | 0.065 |
| *Streptococcaceae* | 0.002 | [-0.006, 0.017] | 0.754 | 0.009 | [-0.027, 0.045] | 0.632 |
| *Bifidobacteriaceae* | 0.015 | [-0.000, 0.044] | 0.220 | -0.020 | [-0.059, 0.019] | 0.317 |
| *Bacteroidaceae* | 0.007 | [-0.003, 0.036] | 0.511 | 0.007 | [-0.078, 0.092] | 0.875 |
| *Veillonellaceae* | 0.001 | [-0.007, 0.012] | 0.792 | 0.007 | [-0.070, 0.084] | 0.862 |
| *Erysipelotrichaceae* | 0.006 | [-0.012, 0.025] | 0.557 | -0.042 | [-0.228, 0.144] | 0.657 |
| *Coriobacteriaceae* | 0.006 | [-0.003, 0.018] | 0.324 | 0.158 | [-0.152, 0.467] | 0.319 |
| *Prevotellaceae* | 0.017 | [-0.028, 0.067] | 0.459 | 0.007 | [-0.227, 0.242] | 0.951 |
| *Lactobacillaceae* | -0.006 | [-0.020, 0.011] | 0.992 | -0.030 | [-0.085, 0.025] | 0.285 |
| *Akkermansiaceae* | -0.002 | [-0.013, 0.011] | 0.937 | -0.125 | [-0.368, 0.119] | 0.316 |
| *Acidaminococcaceae* | 0.018 | [0.003, 0.053] | 0.200 | 0.301 | [-0.285, 0.886] | 0.314 |
| *Tannerellaceae* | 0.011 | [-0.006, 0.024] | 0.959 | 0.092 | [-0.241, 0.424] | 0.589 |
| *Burkholderiaceae* | -0.009 | [-0.022, 0.013] | 0.373 | -0.063 | [-1.354, 1.229] | 0.924 |
| *Peptostreptococcaceae* | -0.001 | [-0.014, 0.013] | 0.902 | 0.910 | [-1.049, 2.869] | 0.363 |
| *Firmicutes_unclassified* | 0.007 | [-0.005, 0.024] | 0.381 | 0.060 | [-0.704, 0.824] | 0.877 |
| *Enterococcaceae* | 0.071 | [0.013, 0.160] | 0.100 | -3.285 | [-8.837, 2.268] | 0.246 |
| *Rikenellaceae* | 0.011 | [-0.022, 0.055] | 0.545 | -0.212 | [-0.852, 0.428] | 0.516 |
| *Micrococcaceae* | 0.038 | [0.009, 0.120] | 0.182 | 2.328 | [-0.701, 5.356] | 0.132 |
| Genus | *Escherichia-Shigella* | 0.003 | [-0.009, 0.022] | 0.694 | -0.001 | [-0.035, 0.032] | 0.937 |
| *Streptococcus* | 0.002 | [-0.006, 0.017] | 0.756 | 0.009 | [-0.027, 0.045] | 0.636 |
| *Bifidobacterium* | 0.015 | [-0.000, 0.044] | 0.221 | -0.020 | [-0.059, 0.019] | 0.316 |
| *Faecalibacterium* | 0.002 | [-0.010, 0.011] | 0.992 | 0.036 | [-0.026, 0.099] | 0.258 |
| *Bacteroides* | 0.007 | [-0.002, 0.037] | 0.510 | 0.017 | [-0.073, 0.107] | 0.711 |
| *Subdoligranulum* | -0.002 | [-0.008, 0.004] | 0.598 | 0.143 | [-0.095, 0.380] | 0.239 |
| *Klebsiella* | 0.001 | [-0.005, 0.010] | 0.764 | -0.033 | [-0.100, 0.035] | 0.342 |
| *Ruminococcus_gnavus_group* | -0.003 | [-0.016, 0.006] | 0.981 | -0.040 | [-0.088, 0.007] | 0.098 |
| *Collinsella* | 0.006 | [-0.003, 0.018] | 0.326 | 0.159 | [-0.153, 0.471] | 0.318 |
| *Agathobacter* | 0.003 | [-0.008, 0.011] | 0.948 | 0.062 | [-0.157, 0.280] | 0.580 |
| *Lactobacillus* | 0.002 | [-0.019, 0.012] | 0.993 | -0.029 | [-0.084, 0.026] | 0.297 |
| *Megamonas* | 0.001 | [-0.012, 0.024] | 0.894 | -0.031 | [-0.104, 0.042] | 0.404 |
| *Ruminococcus_torques_group* | -0.002 | [-0.010, 0.005] | 0.654 | 0.082 | [-0.195, 0.358] | 0.562 |
| *Erysipelotrichaceae_UCG-003* | 0.005 | [-0.020, 0.039] | 0.742 | -0.132 | [-0.321, 0.057] | 0.170 |
| *Akkermansia* | -0.001 | [-0.013, 0.011] | 0.937 | -0.125 | [-0.368, 0.119] | 0.316 |
| *Prevotella_9* | 0.014 | [-0.031, 0.056] | 0.500 | 0.024 | [-0.198, 0.247] | 0.830 |
| *Dialister* | -0.001 | [-0.005, 0.005] | 0.979 | 0.185 | [-0.174, 0.544] | 0.313 |
| *Ruminococcus_2* | -0.002 | [-0.010, 0.008] | 0.545 | 0.195 | [-0.175, 0.564] | 0.301 |
| *Blautia* | 0.008 | [-0.002, 0.039] | 0.518 | 0.102 | [-0.390, 0.593] | 0.685 |
| *Roseburia* | 0.004 | [-0.020, 0.031] | 0.752 | 0.065 | [-0.226, 0.357] | 0.661 |

**Supplementary Table S12 |** The mediation and moderation effects of various levels of gut microbiota on the relationship between daytime dysfunction and Primary Liver Cancer.

| **Level** | **Gut microbiota** | **Mediation Effect** | | | **Moderation Effect** | | |
| --- | --- | --- | --- | --- | --- | --- | --- |
| **Estimate** | **[95% CI]** | ***P-value*** | **Estimate** | **[95% CI]** | ***P-value*** |
| Phylum | *Firmicutes* | 0.003 | [-0.003, 0.012] | 0.512 | 0.003 | [-0.012, 0.017] | 0.710 |
| *Proteobacteria* | 0.004 | [-0.002, 0.015] | 0.391 | -0.001 | [-0.020, 0.017] | 0.897 |
| *Actinobacteria* | 0.001 | [-0.011, 0.011] | 0.987 | 0.010 | [-0.012, 0.031] | 0.383 |
| *Bacteroidetes* | 0.016 | [0.003, 0.037] | 0.092 | -0.031 | [-0.063, 0.001] | 0.058 |
| *Verrucomicrobia* | -0.006 | [-0.016, 0.009] | 0.945 | -0.201 | [-0.403, 0.001] | 0.051 |
| *Fusobacteria* | -0.010 | [-0.033, 0.002] | 0.329 | 0.084 | [-0.874, 1.042] | 0.864 |
| *Cyanobacteria* | 0.010 | [-0.009, 0.032] | 0.404 | -0.599 | [-1.935, 0.736] | 0.379 |
| *Synergistetes* | -0.003 | [-0.010, 0.004] | 0.974 | -0.725 | [-4.421, 2.971] | 0.701 |
| *Tenericutes* | 0.004 | [-0.009, 0.043] | 0.760 | -2.280 | [-15.253, 10.692] | 0.730 |
| *Patescibacteria* | 0.003 | [-0.008, 0.017] | 0.687 | 1.648 | [-7.802, 11.098] | 0.732 |
| *Epsilonbacteraeota* | -0.005 | [-0.017, 0.005] | 0.422 | -1.455 | [-2.010, -0.900] | 0.011 |
| *Acidobacteria* | -0.001 | [-0.005, 0.004] | 0.998 | 16.761 | [-27.961, 61.484] | 0.463 |
| *unclassified* | -0.003 | [-0.028, 0.001] | 0.736 | 0.039 | [ -0.253, 0.331] | 0.795 |
| *Planctomycetes* | -0.003 | [-0.021, 0.016] | 0.790 | -1.684 | [-11.299, 3.931] | 0.721 |
| *Gemmatimonadetes* | 0.001 | [-0.033, 0.027] | 0.963 | -1.068 | [-8.480, 6.344] | 0.220 |
| *Elusimicrobia* | -0.015 | [-0.067, 0.018] | 0.559 | -3.204 | [-11.648, 3.241] | 0.867 |
| *Deferribacteres* | -0.011 | [-0.032, 0.009] | 0.338 | 1.662 | [-15.160, 8.484] | 0.985 |
| *Chloroflexi* | -0.001 | [-0.011, 0.002] | 0.742 | 0.001 | [-0.285, 0.288] | 0.993 |
| *Spirochaetes* | -0.002 | [-0.013, 0.035] | 0.889 | -1.028 | [-12.380, 10.323] | 0.976 |
| *Fibrobacteres* | 0.005 | [-0.005, 0.046] | 0.774 | 0.106 | [-5.857, 6.069] | 0.997 |
| Class | *Clostridia* | 0.004 | [-0.004, 0.017] | 0.440 | 0.003 | [-0.011, 0.016] | 0.697 |
| *Gammaproteobacteria* | 0.005 | [-0.002, 0.014] | 0.404 | -0.001 | [-0.020, 0.017] | 0.900 |
| *Bacilli* | 0.003 | [-0.005, 0.014] | 0.597 | -0.008 | [-0.021, 0.005] | 0.252 |
| *Actinobacteria* | 0.005 | [-0.010, 0.029] | 0.584 | 0.012 | [-0.012, 0.036] | 0.310 |
| *Bacteroidia* | 0.016 | [0.003, 0.037] | 0.091 | -0.031 | [-0.063, 0.001] | 0.059 |
| *Negativicutes* | 0.002 | [-0.006, 0.009] | 0.476 | -0.023 | [-0.067, 0.021] | 0.304 |
| *Erysipelotrichia* | 0.010 | [-0.002, 0.032] | 0.291 | 0.156 | [ 0.012, 0.299] | 0.033 |
| *Coriobacteriia* | 0.007 | [-0.003, 0.022] | 0.293 | -0.008 | [-0.064, 0.048] | 0.775 |
| *Verrucomicrobiae* | -0.005 | [-0.016, 0.009] | 0.945 | -0.201 | [-0.403, 0.001] | 0.051 |
| *Firmicutes_unclassified* | -0.004 | [-0.016, 0.010] | 0.516 | 0.158 | [-0.325, 0.640] | 0.522 |
| *Deltaproteobacteria* | 0.002 | [-0.003, 0.008] | 0.963 | 0.073 | [-0.350, 0.495] | 0.736 |
| *Fusobacteriia* | -0.010 | [-0.033, 0.002] | 0.329 | 0.084 | [-0.874, 1.042] | 0.864 |
| *Oxyphotobacteria* | 0.005 | [-0.003, 0.031] | 0.645 | 2.085 | [-3.215, 7.384] | 0.441 |
| *Alphaproteobacteria* | -0.001 | [-0.033, 0.022] | 0.960 | -0.596 | [-3.068, 1.876] | 0.637 |
| *Synergistia* | -0.003 | [-0.010, 0.004] | 0.974 | -0.725 | [-4.421, 2.971] | 0.701 |
| *Mollicutes* | 0.004 | [-0.009, 0.043] | 0.760 | -2.280 | [-15.253, 10.692] | 0.730 |
| *Saccharimonadia* | 0.003 | [-0.008, 0.017] | 0.678 | 1.694 | [-7.797, 11.184] | 0.727 |
| *Bacteroidetes_unclassified* | 0.001 | [-0.018, 0.005] | 0.861 | -3.529 | [-6.398, -1.659] | 0.001 |
| *Melainabacteria* | -0.005 | [-0.044, 0.014] | 0.730 | 0.179 | [-0.298, 0.656] | 0.462 |
| *Campylobacteria* | 0.179 | [-0.298, 0.656] | 0.462 | -1.455 | [-3.010, -0.900] | 0.011 |
| Order | *Clostridiales* | 0.004 | [-0.004, 0.017] | 0.440 | 0.003 | [-0.011, 0.017] | 0.696 |
| *Lactobacillales* | 0.002 | [-0.005, 0.014] | 0.601 | -0.001 | [-0.014, 0.013] | 0.929 |
| *Enterobacteriales* | 0.005 | [-0.002, 0.016] | 0.404 | -0.003 | [-0.021, 0.016] | 0.791 |
| *Bifidobacteriales* | 0.003 | [-0.011, 0.022] | 0.698 | 0.011 | [-0.013, 0.034] | 0.378 |
| *Bacteroidales* | 0.016 | [0.003, 0.037] | 0.091 | -0.031 | [-0.063, 0.001] | 0.060 |
| *Selenomonadales* | 0.002 | [-0.006, 0.009] | 0.476 | -0.023 | [-0.067, 0.021] | 0.304 |
| *Erysipelotrichales* | 0.010 | [-0.002, 0.032] | 0.291 | 0.156 | [ 0.012, 0.299] | 0.033 |
| *Coriobacteriales* | 0.007 | [-0.003, 0.022] | 0.293 | -0.008 | [-0.064, 0.048] | 0.780 |
| *Verrucomicrobiales* | -0.005 | [-0.016, 0.009] | 0.945 | -0.201 | [-0.402, 0.001] | 0.051 |
| *Enterobacterales* | 0.001 | [-0.005, 0.006] | 0.852 | 0.072 | [-0.068, 0.213] | 0.313 |
| *Betaproteobacteriales* | 0.004 | [-0.007, 0.024] | 0.569 | 0.156 | [-0.352, 0.664] | 0.548 |
| *Firmicutes_unclassified* | -0.004 | [-0.016, 0.010] | 0.516 | 0.158 | [-0.325, 0.640] | 0.522 |
| *Micrococcales* | 0.032 | [0.010, 0.056] | 0.010 | 0.745 | [-0.716, 2.206] | 0.317 |
| *Desulfovibrionales* | 0.002 | [-0.003, 0.008] | 0.959 | 0.072 | [-0.350, 0.495] | 0.737 |
| *Fusobacteriales* | -0.010 | [-0.033, 0.002] | 0.329 | 0.084 | [-0.874, 1.042] | 0.864 |
| *Pasteurellales* | -0.003 | [-0.013, 0.004] | 0.635 | -0.050 | [-0.462, 0.363] | 0.814 |
| *Actinomycetales* | -0.004 | [-0.031, 0.032] | 0.816 | 1.394 | [-0.267, 3.055] | 0.100 |
| *Oxyphotobacteria_unclassified* | 0.005 | [-0.003, 0.030] | 0.642 | 2.293 | [-3.157, 7.742] | 0.410 |
| *Bacillales* | 0.005 | [-0.019, 0.029] | 0.717 | 3.015 | [-0.544, 6.574] | 0.097 |
| *Pseudomonadales* | 0.003 | [-0.006, 0.014] | 0.982 | 4.682 | [-2.440, 11.805] | 0.198 |
| Family | *Ruminococcaceae* | 0.001 | [-0.004, 0.011] | 0.882 | 0.002 | [-0.015, 0.020] | 0.790 |
| *Enterobacteriaceae* | 0.005 | [-0.001, 0.018] | 0.347 | -0.002 | [-0.020, 0.017] | 0.873 |
| *Lachnospiraceae* | 0.006 | [-0.005, 0.021] | 0.353 | 0.001 | [-0.024, 0.026] | 0.943 |
| *Streptococcaceae* | 0.001 | [-0.007, 0.011] | 0.790 | -0.003 | [-0.018, 0.012] | 0.669 |
| *Bifidobacteriaceae* | 0.003 | [-0.011, 0.022] | 0.698 | 0.011 | [-0.013, 0.034] | 0.378 |
| *Bacteroidaceae* | 0.004 | [-0.003, 0.016] | 0.377 | -0.033 | [-0.085, 0.020] | 0.220 |
| *Veillonellaceae* | 0.001 | [-0.007, 0.004] | 0.783 | -0.028 | [-0.071, 0.016] | 0.212 |
| *Erysipelotrichaceae* | 0.010 | [-0.002, 0.032] | 0.291 | 0.156 | [0.012, 0.299] | 0.033 |
| *Coriobacteriaceae* | 0.006 | [-0.003, 0.020] | 0.286 | -0.011 | [-0.068, 0.045] | 0.691 |
| *Prevotellaceae* | 0.020 | [-0.006, 0.056] | 0.238 | -0.093 | [-0.182, -0.005] | 0.039 |
| *Lactobacillaceae* | 0.003 | [-0.006, 0.010] | 0.892 | 0.014 | [-0.056, 0.083] | 0.697 |
| *Akkermansiaceae* | -0.004 | [-0.016, 0.009] | 0.945 | -0.201 | [-0.402, 0.001] | 0.051 |
| *Acidaminococcaceae* | 0.009 | [-0.002, 0.026] | 0.233 | 0.066 | [-0.159, 0.292] | 0.565 |
| *Tannerellaceae* | -0.002 | [-0.014, 0.006] | 0.743 | -0.184 | [-0.411, 0.042] | 0.111 |
| *Burkholderiaceae* | 0.005 | [-0.008, 0.028] | 0.560 | 0.235 | [-0.351, 0.821] | 0.433 |
| *Peptostreptococcaceae* | 0.001 | [-0.003, 0.009] | 0.695 | -0.012 | [-0.507, 0.483] | 0.962 |
| *Firmicutes_unclassified* | -0.004 | [-0.016, 0.010] | 0.516 | 0.158 | [-0.325, 0.640] | 0.522 |
| *Enterococcaceae* | 0.024 | [0.013, 0.058] | 0.038 | -2.974 | [-9.169, 3.222] | 0.347 |
| *Rikenellaceae* | 0.019 | [-0.006, 0.072] | 0.347 | -0.128 | [-0.526, 0.269] | 0.527 |
| *Micrococcaceae* | 0.022 | [0.009, 0.056] | 0.011 | 0.739 | [-0.723, 2.201] | 0.322 |
| Genus | *Escherichia-Shigella* | 0.004 | [-0.004, 0.015] | 0.427 | -0.008 | [-0.028, 0.012] | 0.441 |
| *Streptococcus* | 0.001 | [-0.007, 0.011] | 0.790 | -0.003 | [-0.018, 0.012] | 0.669 |
| *Bifidobacterium* | 0.003 | [-0.011, 0.022] | 0.698 | 0.011 | [-0.013, 0.034] | 0.377 |
| *Faecalibacterium* | 0.001 | [-0.007, 0.009] | 0.895 | 0.023 | [-0.011, 0.057] | 0.191 |
| *Bacteroides* | 0.004 | [-0.002, 0.016] | 0.369 | -0.031 | [-0.083, 0.021] | 0.245 |
| *Subdoligranulum* | 0.001 | [-0.004, 0.014] | 0.788 | 0.042 | [-0.029, 0.112] | 0.246 |
| *Klebsiella* | 0.002 | [-0.004, 0.009] | 0.987 | 0.039 | [-0.023, 0.101] | 0.217 |
| *Ruminococcus_gnavus_group* | -0.001 | [-0.008, 0.007] | 0.918 | -0.002 | [-0.028, 0.024] | 0.873 |
| *Collinsella* | 0.006 | [-0.003, 0.020] | 0.289 | -0.012 | [-0.068, 0.045] | 0.683 |
| *Agathobacter* | -0.003 | [-0.013, 0.004] | 0.465 | -0.033 | [-0.156, 0.090] | 0.602 |
| *Lactobacillus* | 0.003 | [-0.006, 0.011] | 0.912 | 0.014 | [-0.055, 0.084] | 0.687 |
| *Megamonas* | 0.001 | [-0.012, 0.004] | 0.826 | -0.034 | [-0.090, 0.023] | 0.245 |
| *Ruminococcus_torques_group* | 0.006 | [-0.002, 0.035] | 0.544 | 0.192 | [-0.012, 0.397] | 0.065 |
| *Erysipelotrichaceae_UCG-003* | 0.012 | [-0.003, 0.047] | 0.398 | 0.092 | [-0.063, 0.247] | 0.246 |
| *Akkermansia* | -0.002 | [-0.016, 0.009] | 0.945 | -0.201 | [-0.402, 0.001] | 0.051 |
| *Prevotella_9* | 0.017 | [-0.009, 0.048] | 0.257 | -0.078 | [-0.176, 0.020] | 0.119 |
| *Dialister* | -0.001 | [-0.006, 0.004] | 0.623 | 0.225 | [ 0.007, 0.442] | 0.043 |
| *Ruminococcus_2* | 0.002 | [-0.007, 0.009] | 0.898 | -0.010 | [-0.079, 0.060] | 0.789 |
| *Blautia* | 0.004 | [-0.004, 0.016] | 0.480 | 0.070 | [-0.171, 0.312] | 0.570 |
| *Roseburia* | -0.001 | [-0.012, 0.011] | 0.898 | 0.020 | [-0.196, 0.236] | 0.854 |
